1 **Targeting tumor stemness switch phenotype by activating pathogen induced stem cell niche**  
2 **defense**

3  
4 **Seema Bhuyan<sup>1</sup>, Bidisha Pal<sup>3,4</sup>, Lekhika Pathak<sup>1,2</sup>, Partha Jyoti Saikia<sup>1</sup>, Shirsajit Mitra<sup>1</sup>,**  
5 **Sukanya Gayan<sup>1</sup>, Reza Bayat Mokhtari<sup>3,4</sup>, Hong Li<sup>3,4</sup>, , Chilakamarti V Ramana<sup>3</sup>, Debabrat**  
6 **Baishya<sup>5</sup>, Bikul Das<sup>1,2,3,4</sup>**

7  
8  
9 **<sup>1</sup>Department of Cancer and Stem Cell Biology, KaviKrishna Laboratory, Indian Institute of**  
10 **Technology Guwahati Research Park, Guwahati, Assam, India**

11 **<sup>2</sup>Department of Stem Cell and Infectious Diseases, KaviKrishna Laboratory, Indian Institute**  
12 **of Technology Guwahati Research Park, Guwahati, Assam, India**

13 **<sup>3</sup>Department of Experimental Therapeutics, Thoreau Laboratory for Global Health, Univer-**  
14 **sity of Massachusetts, Lowell, MA, USA**

15 **<sup>4</sup>Department of Immunology and Infectious diseases, Forsyth Institute, Cambridge, Massa-**  
16 **chusetts**

17 **<sup>5</sup>Department of Bioengineering and Technology, Gauhati University, Guwahati, Assam, India**

18

19

20

21

22

23 **\*Correspondence:**

24 **Corresponding Author: Bikul Das, MD, PhD; [bdas@kavikrishnalab.org](mailto:bdas@kavikrishnalab.org)**

25

26 **Abstract**

27 Cancer stem cells (CSCs) reside in their tumor microenvironment (TME) niches, which are  
28 often hypoxic. Previously, we found that hypoxia and oxidative stress prevalent in TME may re-  
29 program CSCs to a highly aggressive and inflammatory phenotype, the tumor stemness switch  
30 (TSS) phenotype. We previously reported a “stem cell niche defense” mechanism in bone marrow  
31 and lung mesenchymal stem cell niche against pathogen. Pathogen induced bystander apoptosis  
32 (PIBA) of stem cells harboring intracellular pathogen may be part of this defense mechanism. We  
33 speculate that the TSS phenotype may also activate this niche defense mechanism to defend their  
34 TME niche against pathogen and therefore could be exploited to target CSCs. Here we report that  
35 CSCs of TSS phenotype enriched in post-hypoxia ABCG2<sup>+</sup> CSCs of several cell lines of diverse  
36 tumors including oral squamous cell carcinoma cell line SCC-25 exhibited bystander apoptosis  
37 when infected with either Bacillus Calmette Guerin (BCG) or mutant *Mycobacterium tuberculosis*  
38 (*Mtb*) strain 18b. The conditioned media (CM) of the infected cells not only exhibited marked anti-  
39 tumor activity in vivo, but also showed significant anti-microbial activity. A detailed mechanisms  
40 study revealed that some of the infected ABCG2<sup>+</sup> CSCs underwent pyroptosis and released a high  
41 mobility group box protein 1 (HMGB1)/p53 death signal that can induce a toll like receptor (TLR)  
42 2/4 mediated bystander apoptosis. Thus, our findings suggest that PIBA can be utilized to activate  
43 the “niche defense” mechanism in TSS phenotype, which not only target the TSS, but also exhibit  
44 marked anti-tumor activity in vivo.

45

46

47

48

49

50

## 51 **Introduction**

52 Cancer stem cells (CSCs) are endowed with self-renewal capacity, and reside in specific  
53 niches in the tumor microenvironment (TME). CSCs reside in both the perivascular and hypoxic  
54 niches and maintain a steady proportion among the heterogeneous cancer cell population [1]. CSCs  
55 are found to express drug efflux pumps such as ATP Binding Cassette Subfamily G Member 2  
56 (ABCG2) [1], exhibit marked detoxification and anti-oxidant activities which makes them inherent-  
57 ly resistant to chemo and radiation therapy. Moreover, targeted therapies that inhibit oncogene or  
58 growth factor driven pathways fail to target CSCs [2] as these self-renewing cancer cells may acti-  
59 vate multiple growth factor pathways. Anti-angiogenesis therapy may aid into the CSC mainte-  
60 nance by increasing tumor hypoxia [3]. Furthermore, immunomodulatory attributes of CSCs make  
61 them exceptionally adept at evading immune monitoring [4], and also resistant to immunotherapy.  
62 Thus, CSCs are difficult to target by conventional anti-cancer strategies.

63 Importantly, hypoxia and oxidative stress prevailing in TME may reprogram CSCs to a  
64 highly inflammatory and aggressive phenotype, the tumor stemness switch (TSS) phenotype [19];  
65 [52], [53]. Moreover, chemotherapy and radiation induced oxidative stress may also reprogram  
66 CSCs to this TSS phenotype [5]. Earlier we reported a cisplatin mediated TSS phenotype in migra-  
67 tory side population (SP) cells; following cisplatin therapy these cells exhibited rapid self-renewal,  
68 expressed stemness genes such as octamer-binding transcription factor 4 (Oct-4) and Nanog as well  
69 as secreted angiogenic growth factors [5]. Others also reported drug-induced stemness in several  
70 tumor models [6], [7]. Subsequently, using a SCC-25 oral cancer derived CSC model, we showed  
71 that chemotherapy-induced TSS enable CSCs to modulate TME for rapid tumor progression and  
72 immune suppression [8], [9]. In addition, we found that oral CSCs undergo inflammation and bac-  
73 teria mediated TSS phenotype [10], [11], which also contribute to rapid tumor progression. There-  
74 fore, there is a strong rationale to develop innovative therapies to target CSCs exhibiting TSS phe-  
75 notype.

76 Apoptosis reinstatement has been a promising anti-cancer strategy; bystander apoptosis in-  
77 curred by activated macrophages, if suitably courted, could be significant to treatment success [12].  
78 Cancer cells undergoing apoptosis may activate macrophage mediated innate immune mechanism  
79 of phagocytosis leading to bystander apoptosis of cancer cells [12]. However, CSCs may suppress  
80 the macrophage mediated cancer cell killing [13].

81 So far, the potential of pathogen induced apoptosis (PIA) in targeting CSCs has not been in-  
82 vestigated. PIA is an innate defense system of innate immune cells that has evolved to defend hosts  
83 from invading pathogens [14]. When intracellular pathogen such as *Mtb* internalizes in macrophag-  
84 es, these infected cells undergo PIA to confine and restrain the mycobacterial growth [15]. PIA may  
85 also involve pyroptosis, a mode of cell death that can spill pathogen-induced molecular pattern  
86 (PAMP) and damage associated molecular pattern (DAMP) such as high mobility group box pro-  
87 tein 1 (HMGB1) into the microenvironment [16], [27]. Importantly, PIA may involve bystander  
88 apoptosis; *Mtb* infected macrophages were found to induce apoptosis in neighbouring uninfected  
89 macrophages [15]. Our work on *Mtb* infected MSC model indicates that pathogen induced bystand-  
90 er apoptosis (PIBA) may be part of the stem cell niche defense, an innate defense mechanisms that  
91 involves stem cell altruism [25], [40], [53].

92 We hypothesize that BCG and *Mtb* may cause PIBA of CSCs. Importantly, TSS phenotype  
93 of CSCs may activate the “stem cell niche defense” mechanism to defend their TME niche similar  
94 to altruistic stem cells (ASCs) [53], [25]. This innate defense mechanism may involve not only se-  
95 creting anti-microbial factors, but also eliminating self to avoid being attractive site for pathogen’s  
96 replication. Hence, we speculate that this PIBA could be utilized to target CSCs of TSS phenotype  
97 in the TME niche. Here, we tested this hypothesis by using an invitro model of *Mtb* and *BCG* in-  
98 fected CSCs. BCG is an attractive candidate for PIBA of CSCs, as it is already in clinical use  
99 against bladder cancer for the last four decades [17], [18].

100 We found that *BCG* preferentially infects and replicates intracellular to CSCs of TSS pheno-  
101 type obtained from diverse cancer cell lines including SCC-25 oral cancer cell line [16], [46]. *BCG*  
102 infected CSCs of TSS phenotype undergo pyroptosis and releases a death signal, the HMGB1/p53  
103 complex, which then induces bystander apoptosis of CSCs in a TLR 2/4 dependent manner. These  
104 results identify a novel mechanism of PIA having potential therapeutic implications.

## 105 **Results**

### 106 ***BCG* replicates intracellular to ABCG2+ CSCs and induces pyroptosis**

107 We hypothesized that *BCG* and *Mtb* may induce pathogen induced bystander apoptosis (PI-  
108 BA) of CSCs exhibiting TSS phenotype, as this phenotype may activate the “stem cell niche de-  
109 fense” mechanism to defend their TME niche similar to ASCs [53], [25]. This innate defense  
110 mechanism may involve not only secreting anti-microbial factors, but also eliminating self to avoid  
111 being an attractive site for pathogen’s replication. To test this hypothesis, we have utilized several  
112 cancer cell line-derived xenograft models, where we characterized the TSS phenotype. In these  
113 xenografts of neuroblastoma (SKN-BE-2), sarcoma (HOS and RH4), small cell lung cancer (H-  
114 146), colon cancer (LOVO), breast cancer (MCF-7), and oral squamous cell cancer (SCC-25), we  
115 found that ABCG2+ CSCs having high tumorigenic activity reside in the hypoxic TME niche and  
116 exhibit TSS phenotype [19], [46], [54], [55]. We previously obtained this highly tumorigenic  
117 ABCG2+ CSCs from side population (SP) cells [43] when exposed to 24 hours of hypoxia followed  
118 by 24 hours of re-oxygenation [19]. We termed these cells as post hypoxia migratory SP cells or  
119 SPm (hox) cells [19]. These SPm (hox) cells exhibit TSS phenotype, and enriched in ABCG2+  
120 CSCs [19], [52]. The post hypoxia non-migratory SP cells or SPn (hox) cells were enriched in  
121 ABCG2- CSCs [19], [52]. When these cancer cell lines are exposed to an in vitro system of hypox-  
122 ia and reoxygenation, the ABCG2+ CSCs (equivalent to migratory SP cells) reprogram to TSS  
123 phenotype [19], [52]. These post-hypoxia/reoxygenation ABCG2+ CSCs or TSS phenotype, when  
124 infected with *Mtb-m18b* or *BCG* and cultured in vitro for two weeks (Figure 1A), there was 4-5

125 fold loss of viability as compared to post hypoxia/reoxygenation ABCG2- CSCs ( $p < 0.001$ , Figure  
126 1B-C), and or pre-hypoxia SP cells. Importantly, the conditioned media (CM) of ABCG2+ CSCs  
127 exhibited 3-4 fold anti-microbial toxicity ( $p < 0.05$ , Figure 1D), suggesting that the TSS may defend  
128 their niches from pathogen infection. Our result also suggests that to defend the niche, the TSS also  
129 exhibited the PIBA of neighbor ABCG2+ CSCs (Figure 1B-C).

130 We reasoned that exploring the BCG-induced bystander apoptosis in oral cancer CSCs may  
131 have clinical utility, as oral cancer lesions are externally accessible for future BCG immunotherapy.  
132 Hence, we decided to study the potential PIBA in the SCC-25 cell line. Thus, the ABCG2+  
133 CSCs/ABCG2- CSCs were immunomagnetically sorted from post hypoxia/oxidative stress treated  
134 SCC-25 cells [19]. The sorted CSCs were infected with GFP-tagged BCG as previously described  
135 [20] and subjected to confocal microscopy. The *Mtb*- colony forming unit (CFU) was performed  
136 after 4 days of in vitro cell growth of CSCs infected with green fluorescent protein (GFP)-tagged  
137 BCG. *Mtb*-CFU assay confirmed the internalization and replication of the GFP-BCG mostly to  
138 ABCG2+ CSCs versus ABCG2- CSCs (Figure 2A & B). The result suggests that the BCG patho-  
139 gen may selectively infect and replicate in ABCG2+ CSCs versus ABCG2- CSCs. The intracellular  
140 replication of pathogen in ABCG2+ CSCs versus ABCG2- CSC is not restricted to *Mycobacterium*  
141 *bovis*, as similar result was observed when the CSCs were infected with an *Mtb* strain m18b, and  
142 the infected cells were grown for 4 days [39]. This selective uptake of BCG/*Mtb* by ABCG2+  
143 CSCs, as well as their intracellular replication allows us to evaluate long-term fate of these infected  
144 cells.

145 In macrophages, *Mycobacteria* are known to replicate during the first week of infection, and  
146 subsequently, the host cells undergo cell death by apoptosis as well as pyroptosis by the second  
147 week of infection [21]. To evaluate whether BCG and *Mtb-m18b* infected ABCG2+ CSCs may also  
148 undergo cell death by apoptosis and pyroptosis due to intracellular replication of the pathogen, the  
149 infected cancer cells ( $10^4$ /ml) were grown in vitro for 16 days to find out the day, when pathogen

150 replication goes down with associated increase in host cell death. BCG/*Mtb-m18b* infected  
151 ABCG2<sup>-</sup> CSCs served as control. Thus, every 4<sup>th</sup> day,  $5 \times 10^3$  cells were recovered, subjected to try-  
152 pan blue viability assay, and then lysed to perform the BCG/*Mtb-m18b* CFU assay for evaluating  
153 intracellular bacterial replication. Indeed, BCG/*Mtb-m18b* infected ABCG2<sup>+</sup> CSCs showed a 100-  
154 fold ( $p < 0.0001$ ; Figure 2C) increase in the number of intracellular CFUs on day 8 without exhibit-  
155 ing any marked loss in cell viability (Figure 2D). These results further confirm that the pathogens  
156 selectively infect and replicate in ABCG2<sup>+</sup> CSCs versus ABCG2<sup>-</sup> CSCs. Notably, the pathogen  
157 infected ABCG2<sup>+</sup> CSCs showed marked loss of intracellular CFUs between day 8 and 16 (Figure  
158 2C), as well as 4.5-fold loss of viability between day 8 and 12 ( $p < 0.001$ ; Figure 2D). On day-12,  
159 the infected ABCG2<sup>+</sup> CSCs exhibited significant up-regulation of caspase-3, as well as caspase-1,  
160 a marker of pyroptosis (Figure 2E). These results indicate that the *Mycobacteria* selectively infect,  
161 replicate and then induce apoptosis/pyroptosis in ABCG2<sup>+</sup> CSCs of SCC-25 cell line.

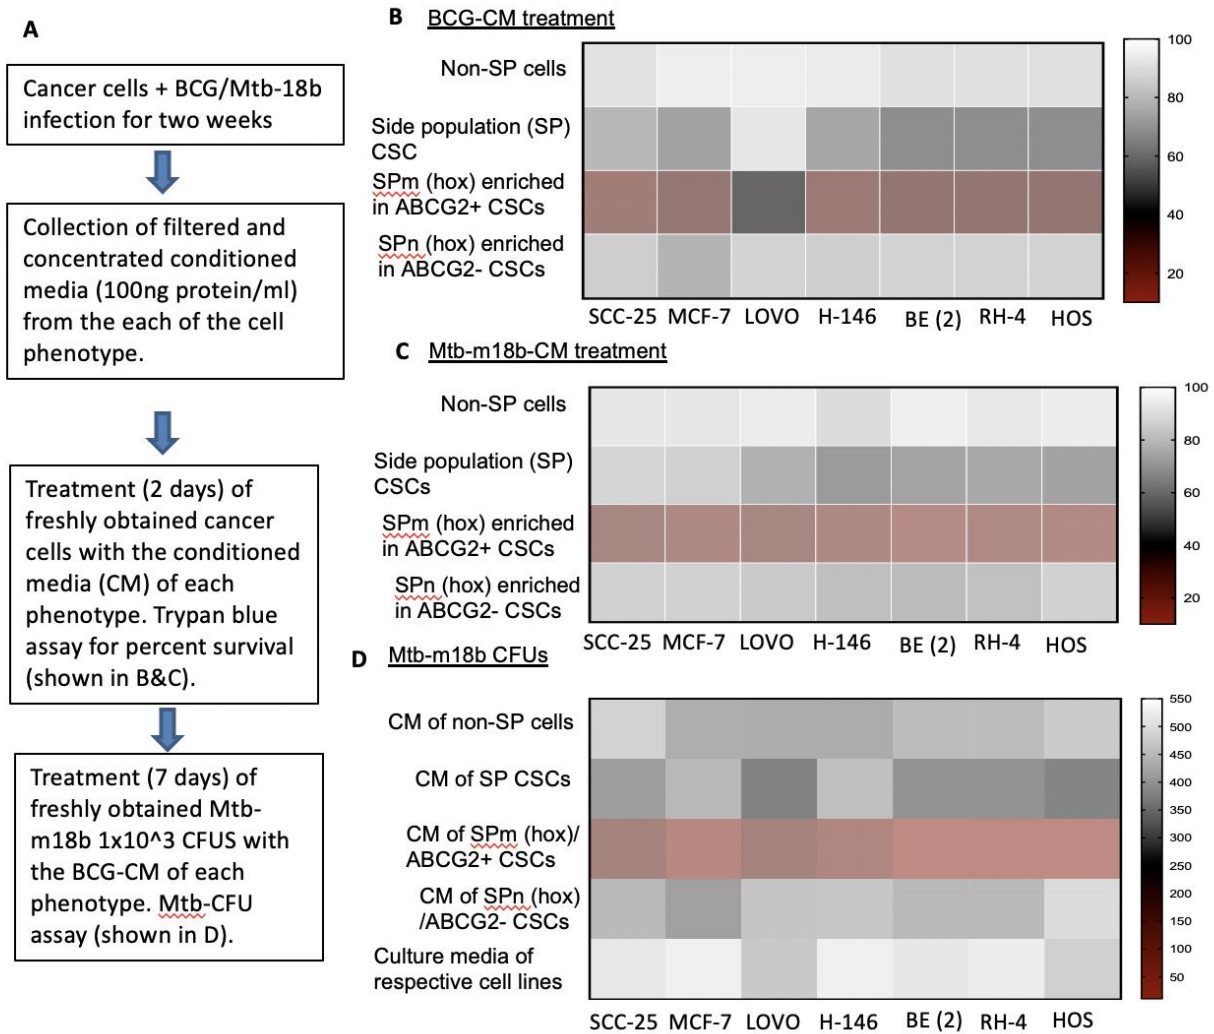

162  
 163 **Figure 1: The TSS phenotype of ABCG2+ CSCs exhibit BCG or Mtb-m18b mediated bystander**  
 164 **apoptosis and anti-microbial activity.** A. Experimental plan. To investigate the niche defense po-  
 165 **potential of each phenotype, we treated the CM of infected phenotype with the untreated correspond-**  
 166 **ing phenotype. B&C. Marked bystander cell death is seen in the ABCG+ CSCs group. D. The CM**  
 167 **of ABCG2+ CSCs exhibit anti-microbial activity against Mtb-m18b.**



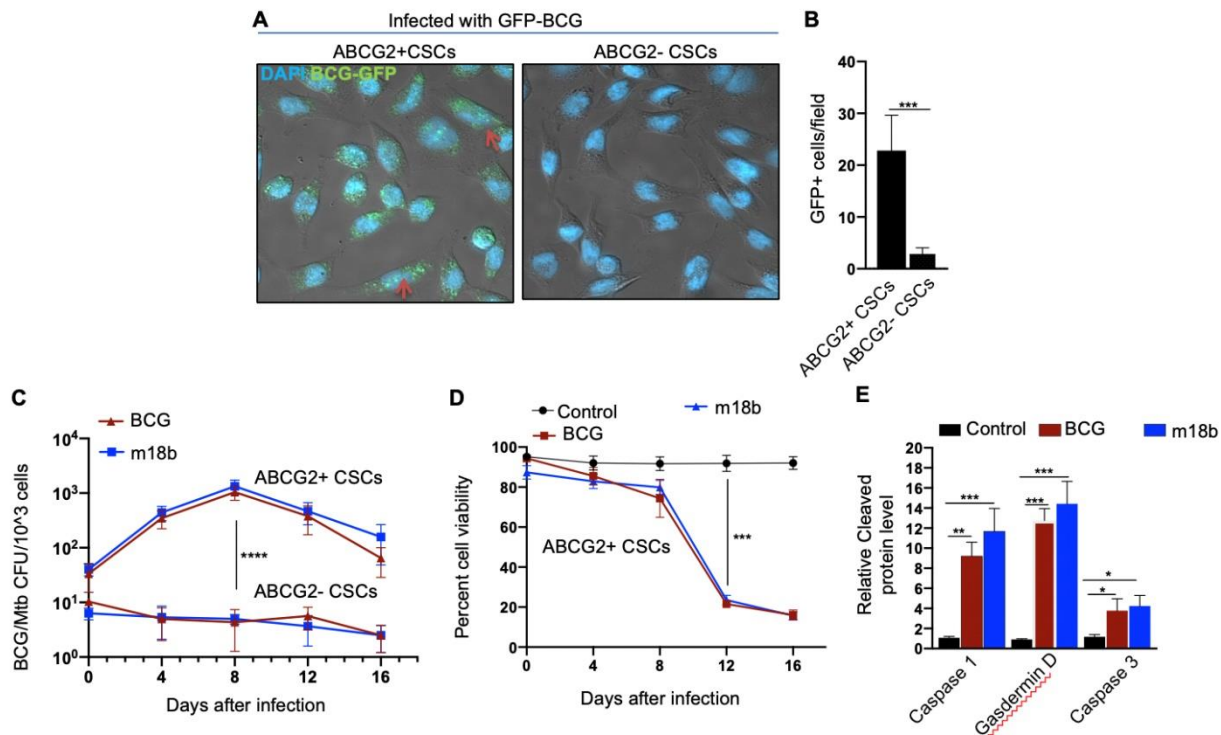

168  
 169 **Figure 2: BCG replicates intracellularly to ABCG2+CSCs of SCC-25 cell line and induces py-**  
 170 **roptosis.** ABCG2+ CSCs exposed to the in vitro system of hypoxia and reoxygenation [19] is sen-  
 171 sitive to BCG-induced cell death. **A.** Confocal microscopy images (magnification 20x) showing the  
 172 localization of GFP-positive BCG intracellularly to ABCG2+CSCs (shown with arrows) versus  
 173 ABCG2- CSCs. **B.** Histogram shows 20-fold increase in GFP-positive BCG per hundred micro-  
 174 scopic field in ABCG2+ CSCs versus ABCG2- CSCs. **C.** Intracellular BCG/Mtb m18b- CFU in  
 175 ABCG2+CSCs versus ABCG2- CSCs at various days after infection. **D.** Trypan blue assay of cell  
 176 viability of BCG/Mtb-m18b infected ABCG2+CSCs at various days after infection. The control  
 177 group is the ABCG2+CSCs without any infection **E.** ELISA based measurement of cleaved Caspa-  
 178 se-1, Gasdermin D and Caspase-3 levels in ABCG2+ CSCs of day-12 after BCG/Mtb-m18b infec-  
 179 tion. Data represent means  $\pm$  SEM (B-D).  $N=3$  independent experiments \* $p<0.05$ , \*\* $p<0.01$ , \*\*\*  
 180  $p<0.001$ , \*\*\*\* $p<0.0001$  (student t-test).

181

182

183 **The CM of BCG infected ABCG2+ CSCs induces bystander apoptosis in non-infected**  
184 **ABCG2+ CSCs**

185 Next, we evaluated the potential induction of bystander apoptosis by the CM of BCG and  
186 *Mtb-m18b* infected ABCG2+ CSCs. On day 12, the CM of BCG or *Mtb-m18b* infected ABCG2+  
187 CSCs was collected, filter sterilized with 0.2 $\mu$ m filter, concentrated with Centricon centrifugal filter  
188 units (EMD Millipore) to 10X and then used to treat fresh ABCG2+ CSCs. The CM treated cells  
189 were evaluated for the *Mtb*-CFUs, cell viability and caspase 1 & 3 protein levels. The 72 hours CM  
190 treated fresh ABCG2+ CSCs showed 4-5 fold reduction in cell viability ( $p < 0.0001$ ; figure 3A),  
191 without any evidence of *Mtb*-CFU growth. The loss of cell viability was associated with 10-12 fold  
192 increase in cleaved caspase 3 level whereas, the level of cleaved caspase-1 remained unchanged  
193 (Figure 3B). These results suggested the induction of bystander apoptosis by the CM of BCG as  
194 well as *Mtb-m18b* infected ABCG2+ CSCs.

195 As per our hypothesis, bystander apoptosis is the result of alarm signals released by the host  
196 cells, where pathogen replicates. Therefore, inhibition of pathogen replication in the host cells may  
197 significantly reduce bystander apoptosis of neighboring cells. To test this hypothesis, the BCG-  
198 infected ABCG2+ CSCs were treated with rifampicin (2 $\mu$ g/ml) for 2 days that kills intracellular  
199 BCG [39]. On day-12, the CM (henceforth known as BCG+Rif-CM) was collected, filter sterilized,  
200 and added to freshly grown ABCG2+ CSCs. The BCG+Rif-CM treated cells were then evaluated  
201 for cell viability, cleaved caspase 1 and 3 levels. BCG-CM treated ABCG2+ CSCs were used as  
202 positive control. We found that the BCG+Rif-CM treatment had no significant effect on cell viabil-  
203 ity and apoptosis (Figure 3C). These results indicate that the replication of BCG intracellular to  
204 ABCG2+ CSCs is required for the CM of these cells to induce bystander apoptosis.

205 Next, we evaluated the in vivo potency of bystander apoptosis of ABCG2+ CSC in a SCC-  
206 25 derived xenograft model of NOD/SCID mice, which we recently characterized [8], [41]. The  
207 BCG-CM, BCG+Rif-CM or saline (1 ml/week/i.p.) were injected to SCC-25 tumor bearing

208 NOD/SCID mice (n=10 in each group; initial tumor size of 0.5 mm<sup>3</sup>; Figure 3D). Tumor growth  
 209 was measured weekly until the control tumor (the group with saline alone treatment) reach maxi-  
 210 mum size of 2cc (Figure 3D). At the end of the treatment, tumors were dissociated to obtain single  
 211 cell suspension; the cells were subjected to clonogenic assay, as well as immunomagnetic sorting to  
 212 obtain the ABCG2<sup>+</sup> sub-population cells, and their cleaved caspase 3 levels. Results are given in  
 213 Figure 3 D-F. We found a 4-fold decrease in the tumor volume after 5 weeks of treatment in the  
 214 BCG-CM versus BCG+Rif-CM treated group (Figure 3D-E). Importantly, in the clonogenic assay,  
 215 the ABCG2<sup>+</sup> subpopulation exhibited a 15-fold reduction in the BCG-CM treated group (Figure 3  
 216 F). Due to this low number of ABCG2<sup>+</sup> CSCs, we could not measure the caspase 3 level in these  
 217 cells. Nevertheless, these results indicate the ability of the BCG-CM to target the CSC population,  
 218 as well as reduce the tumor growth in mice.

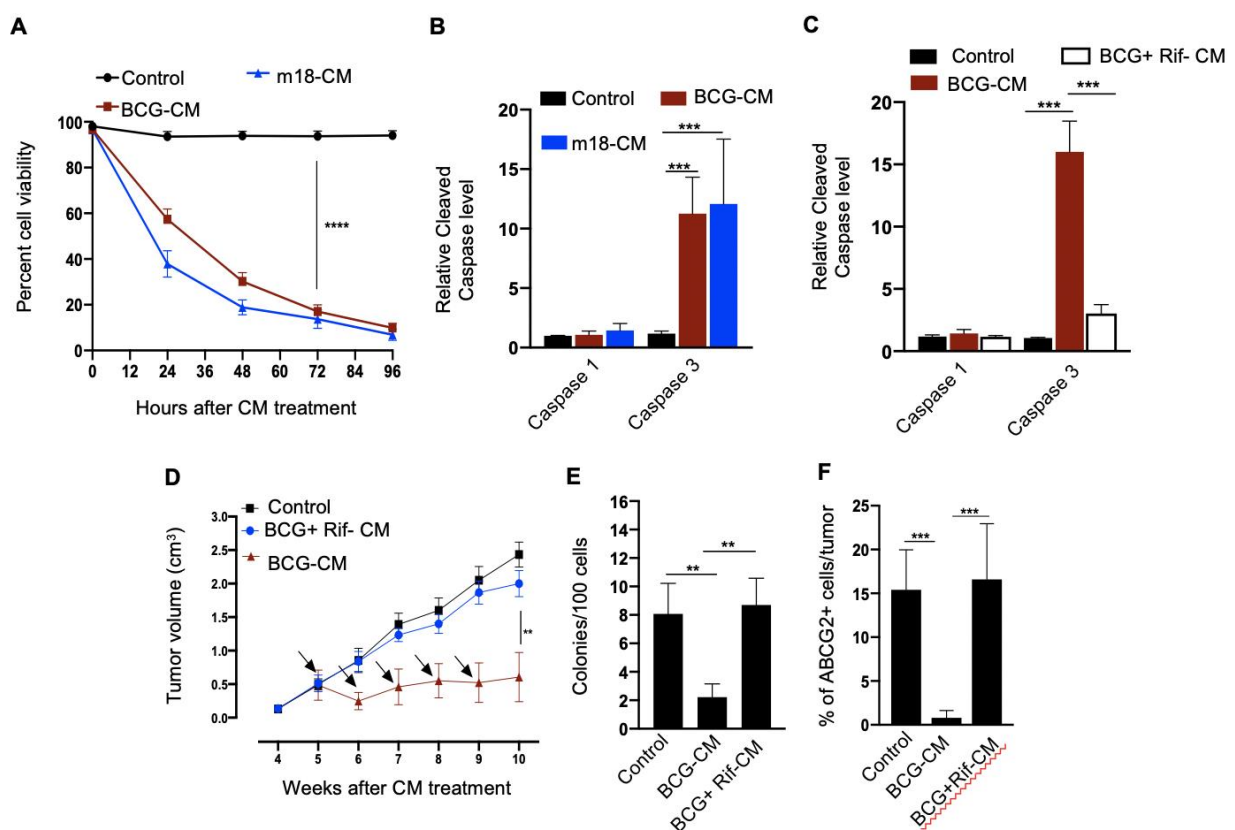

219 **Figure 3: The CM of BCG infected ABCG2<sup>+</sup>CSCs induces bystander apoptosis in non-infected**  
 220 **ABCG2<sup>+</sup> CSCs** A. Trypan blue assay of cell viability of non-infected ABCG2<sup>+</sup>CSCs after treat-

221 *ment with CM of BCG/Mtb-m18b infected ABCG2+ CSCs. The cell count was performed at various*  
222 *hours after the treatment. B&C. ELISA results of cleaved Caspase levels following 48 hours of*  
223 *treatment with the CM of BCG/Mtb-m18b infected ABCG2+ CSCs. Rif+CM denote the CM of BCG*  
224 *infected ABCG2+ CSCs treated with Rifampicin (Rif). D. In vivo growth of tumor in a SCC-25 de-*  
225 *rived xenograft model of NOD/SCID mice (n=10 in each group) treated with CM of BCG infected*  
226 *ABCG2+CSCs. The tumor volume was measured at various weeks after the CM treatment. Arrow*  
227 *indicates the intra-tumor treatment with 0.1 ml of sterile concentrated CM containing 0.5 mg pro-*  
228 *tein. E &F. The clonogenic potential and percentage of ABCG2+ CSC population in dissociated*  
229 *tumor cells obtained from the xenografts of 10<sup>th</sup> week after the CM treatment. Data represent means*  
230 *± SEM (B-D). N=3 independent experiments (A-C); N=5 independent experiments (E-F)\*\*p<0.01,*  
231 *\*\*\* p<0.001, \*\*\*\*p<0.0001 (t-test). BCG-CM: The CM of BCG infected ABCG2+CSCs, m18b-*  
232 *CM: The CM of Mtb-m18b infected ABCG2+ CSCs, Rif-CM: The CM of Rifampicin treated BCG*  
233 *infected ABCG2+CSCs, Control: The CM of ABCG2+ CSCs not infected with BCG/Mtb-m18b*

234

### 235 **Intrinsic apoptotic pathway is involved in bystander apoptosis of ABCG2+ CSCs:**

236 Next, we investigated the cellular and molecular mechanisms of BCG-CM induced bystand-  
237 er apoptosis. We have considered that the BCG infection induced pyroptosis may have released pu-  
238 tative alarm signals capable of inducing bystander apoptosis in neighboring CSCs (Figure 4A). In-  
239 deed, BCG infection was associated with lactate dehydrogenase (LDH) release by ABCG2+ CSCs  
240 (Figure 4B). Treatment of the BCG infected cells with disulfiram (50nM/twice daily for 4 days  
241 starting on day 8), or Caspase -1 inhibitor, which are inhibitor of pyroptosis, led to a marked reduc-  
242 tion in LDH release (Figure 4B). Importantly, the BCG-CM collected from the disulfiram treated  
243 cells showed marked reduction in bystander apoptosis (Figure 4C&D), further suggesting that py-  
244 roptosis played a significant role in bystander apoptosis by releasing soluble factors.

245 We therefore considered identifying the soluble factors released by pyroptotic cells involved  
246 in bystander apoptosis. We first speculated that BCG cell wall skeleton (BCG-CWS), and or BCG-  
247 derived DNA/RNA may be released by pyroptotic cells, thus present in the BCG-CM, and mediate  
248 bystander apoptosis. Previously, these BCG derived products (BCG-CWS or BCG derived  
249 DNA/RNA) were found to induce apoptosis in bladder cancer cells by activating TLR 2, 4, 7 and 9  
250 and thus inducing the Myeloid differentiation primary response gene 88 (MYD88) pathway of ex-  
251 trinsic apoptosis [22], [23]. However, BCG-CWS [23], as well as the live-BCG lysate ( $1 \times 10^7$   
252 BCG in 1 ml of DMEM incubated for 24 hours, and then sterile filtered) failed to induce bystander  
253 apoptosis in ABCG2+ CSCs (Figure 4E).

254 Next, we considered the potential release of soluble factors such as TNF-related apoptosis-  
255 inducing ligand (TRAIL), FAS ligand, tumour Necrosis Factor alpha (TNF-alpha), and transform-  
256 ing growth factor beta (TGF-beta) in the BCG-CM. These soluble factors may induce apoptosis by  
257 activating caspase-8 mediated extrinsic apoptosis [49]. Previously, Kelly DM et al, while studying  
258 the mechanism of BCG-induced bystander apoptosis in macrophages and T-cells did not identify  
259 soluble alarm signals for bystander apoptosis [15]. Similarly, we also did not find any significant  
260 role of these soluble factors in bystander apoptosis; treating the BCG-CM with neutralizing anti-  
261 bodies of these soluble factors did not reduce bystander cell death (Figure 4F). Moreover, inhibition  
262 of caspase-8 did not affect bystander apoptosis (Figure 4F), suggesting that extrinsic pathway was  
263 not involved in bystander apoptosis. Thus, it is unlikely that soluble factor mediated extrinsic apop-  
264 tosis was involved in BCG-CM mediated bystander apoptosis.

265 In contrast, inhibition of intrinsic apoptosis, which is caused by caspase-9 [50] markedly,  
266 reduced bystander apoptosis (Figure 4F). Thus, it appears that BCG-CM may contain soluble fac-  
267 tors that may internalize into the target cancer cells to induce intrinsic apoptosis. We also consid-  
268 ered the potential involvement of other mode of cell death including necroptosis, ferroptosis and  
269 autophagy in bystander apoptosis by pretreating ABCG2+ CSCs with a RIP1-kinase inhibitor

270 (Necrostatin-1), ferroptosis inhibitor (Ferrostatin-1) and an autophagy inhibitor (3-methyladenine; 3  
 271 MA) before treatment with BCG-CM. Relative to vehicle control (DMSO), Ferrostatin -1 prevented  
 272 the effect of BCG-CM induced loss of cell viability (Figure 4F). Conversely, the phenotype was not  
 273 reversed by Necrostatin-1 or 3MA, indicating that necroptosis or autophagy does not affect the  
 274 ability of BCG-CM to induce death of ABCG2+ CSCs. Taken together, BCG-CM may contain sol-  
 275 ule factors that internalize into ABCG2+ CSCs to activate intrinsic apoptosis pathways.

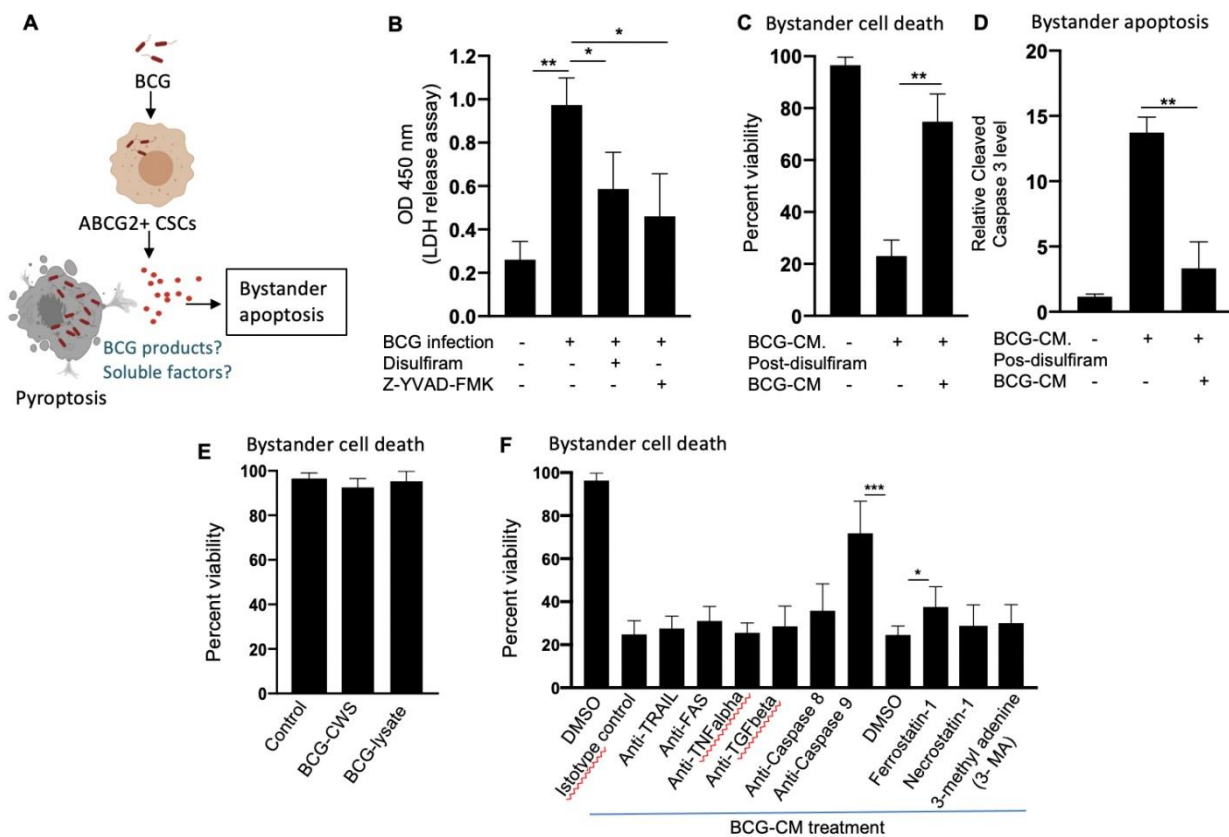

276 **Figure 4: Pyroptosis mediated secretion of soluble factors may induces bystander apoptosis. A.**  
 277 *The schematic is showing the experimental hypothesis. B. The histogram is showing LDH release*  
 278 *by BCG infected ABCG2+ CSCs on day-12. The LDH was measured after treating the BCG-*  
 279 *infected ABCG2+ CSCs with or without disulfiram and Z-YVAD-FMK from day 8-12. C&D. The*  
 280 *data is showing uninfected ABCG2+ CSC viability and bystander apoptosis following treatment of*  
 281 *BCG-CM obtained from the infected ABCG2+ CSCs with or without disulfiram treatment E.*  
 282 *ABCG2+ CSCs are not sensitive to BCG cell wall skeleton (BCG-CWS) and BCG-lysate treatment*

283 *for a week. F. ABCG2+ CSCs were treated with various antibodies and inhibitors during BCG-CM*  
284 *treatment. N=3 independent experiments for B-D, and n=4 independent experiment for E&F, One-*  
285 *Way ANOVA (4B), students t-test (4C, D, F). \* $p < 0.05$ , \*\* $p < 0.01$ , \*\*\*  $p < 0.001$  (student t-test).*

## 286 **Bystander apoptosis of ABCG2+CSCs is associated with HMGB1/p53 death signal**

287 Previously, we identified an intrinsic pathway of apoptosis mediated by p53/MDM2  
288 oscillation [24] and HMGB1 [54] in the ASC phenotype [24], [25]. HMGB1, a DAMP associated  
289 with alarm signaling of innate defense [54] is actively secreted by cancer cells during stress  
290 including hypoxia [47]. Moreover, HMGB1 is secreted by BCG infected immune cells. The  
291 extracellular HMGB1 regulates inflammation and play a pro-tumorigenic role [47]. Therefore, it is  
292 unlikely that HMGB1 alone would induce bystander apoptosis of CSCs. Previously, it was found  
293 that in a colon cancer cell line, HMGB1 binding to p53, along with reactive oxygen species (ROS)  
294 production may induce apoptosis and autophagy [26]. Nuclear Magnetic Resonance (NMR)  
295 spectroscopy as well as in silicon protein structural analysis indicate that p53 can bind to HMGB1  
296 to make stable HMGB1/p53 complex [30]. Thus, it is possible that pyroptotic cells may release  
297 death signal, the HMGB1/p53 complex that mediate bystander apoptosis of neighbor CSCs in the  
298 TME.

299 To investigate this possibility, we did a series of experiments. We first measured HMGB1  
300 and p53 protein levels in the BCG-CM by enzyme linked immunosorbent assay (ELISA) using  
301 iMark Microplate Absorbance Reader (Biorad, Gurgaon, India) as well as western blot (WB) assay.  
302 Next, we performed co-immuno-precipitation (IP) of p53 and HMGB1 to identify the putative  
303 HMGB1/p53 complex in the BCG-CM. The CM of freshly obtained un-infected ABCG2+ CSCs  
304 served as a control. The results are given in Figure 5A&C, showing that p53 protein could be de-  
305 tected in the BCG-CM only. Whereas, HMGB1 could be detected in the CM of both BCG infected  
306 and also the control group (Figure 5A). However, the IP-WB result clearly demonstrates that only  
307 the BCG-CM showed the presence of a HMGB1/p53 complex, as the IP product of HMGB1 con-

308 tained p53 (Figure 5B). Second, we confirmed that pyroptosis is involved in the secretion of this  
309 soluble complex in the CM, as pre-treatment with disulfiram significantly inhibited the secretion of  
310 HMGB1/p53 complex by the BCG infected ABCG2+ CSCs (Figure 5C). Third, we performed a  
311 protein uptake assay to quantify the potential uptake of the HMGB1/p53 complex by the BCG-CM  
312 treated ABCG2+ CSCs. The ABCG2- CSCs served as control. Briefly, p53 was measured in the  
313 CM of these cells after they were treated with BCG-CM. Reduction of the p53 concentration in the  
314 CM will indicate uptake of this protein by the cells. In this manner, we found that within 4 hours of  
315 treatment, ABCG2+ CSCs took 50% of p53 from the BCG-CM (Figure 6A), whereas ABCG2-  
316 CSCs took only 6.5%. Thus, there is a 7.5-fold increase of uptake of p53 by ABCG2+ CSCs com-  
317 pared to ABCG2- CSCs (Figure 6B). There was a corresponding decrease of HMGB1 concentra-  
318 tion in the CM (11.2 +/- 4.3 ng/ml to 8.4 +/-3.2 ng/ml; p= 0.043, n=5), suggesting the uptake of  
319 HMGB1 bound p53 by the ABCG2+ CSCs from the CM. Pre-treatment of BCG-CM with a neu-  
320 tralizing antibody against HMGB1 significantly reduced the p53 uptake by the treated cells (Figure  
321 6A-B), suggesting that ABCG2+ CSCs endocytose HMGB1 bound p53. Fourth, the p53 protein  
322 uptake was associated with the induction of p53/mouse double minute 2 homolog (MDM2) oscilla-  
323 tion and corresponding activation of p53 down-regulating genes as well as increased level of  
324 cleaved caspase 3 in the BCG-CM treated ABCG2+ CSCs (Figure 6C-E). Finally, inhibition of p53  
325 by small molecular inhibitor pifithrin alpha (Figure 6E) or siRNA gene silencing (data not shown)  
326 without inhibiting the HMGB1 significantly reduced cleaved caspase 3 level. We found similar re-  
327 sult when the HMGB1 was neutralized in the BCG-CM treated ABCG2+ CSCs without inhibiting  
328 the p53 (Figure 6E). These findings suggest that the soluble factor HMGB1/p53 complex present in  
329 the BCG-CM may be associated with the bystander apoptosis in ABCG2+ CSCs.



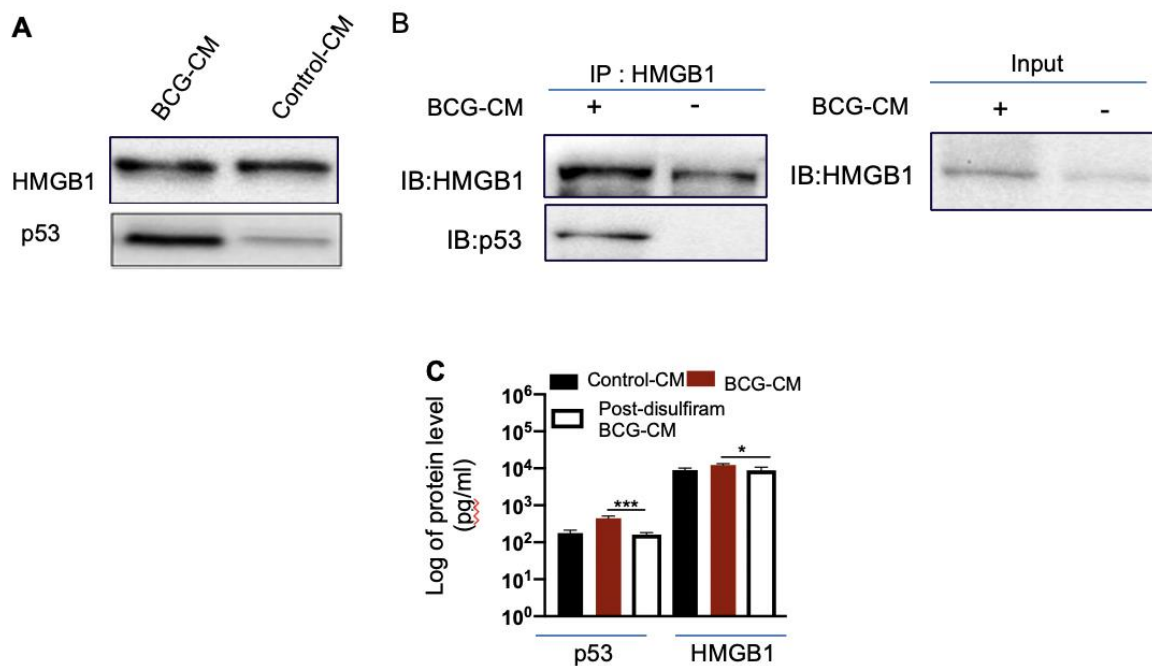

**Figure 5: BCG infected ABCG2+CSCs release HMGB1/p53 complex during pyroptosis. A.**

Western blot of concentrated BCG-CM and control-CM showing the presence of HMGB1 and p53.

10  $\mu$ g protein was loaded in both infected and control group. B. Immunoprecipitation experiment

confirms the formation of HMGB1/p53 complex in BCG-CM versus Control-CM. Immunoblotting

(IB) of HMGB1 and p53 was also performed. Input is 2.5% of the total amount of immunoprecipi-

tated. C. The histogram is showing the secretion of HMGB1/p53 complex by BCG-infected

ABCG2+ CSCs with or without disulfiram treatment (50nM/twice daily for 4 days). The elute of

IP/HMGB1 shown in B was subjected to ELISA, and protein levels were compared with uninfected

ABCG2+ CSCs (p53, average 0.13 ng/ml; HMGB1, average 10.5 ng/ml) to obtain fold change. Da-

ta represent means  $\pm$  SEM (A-E). N=3 independent experiments (A-E). \* $p$ <0.05, \*\*\*  $p$ <0.001 (stu-

dent  $t$ -test).

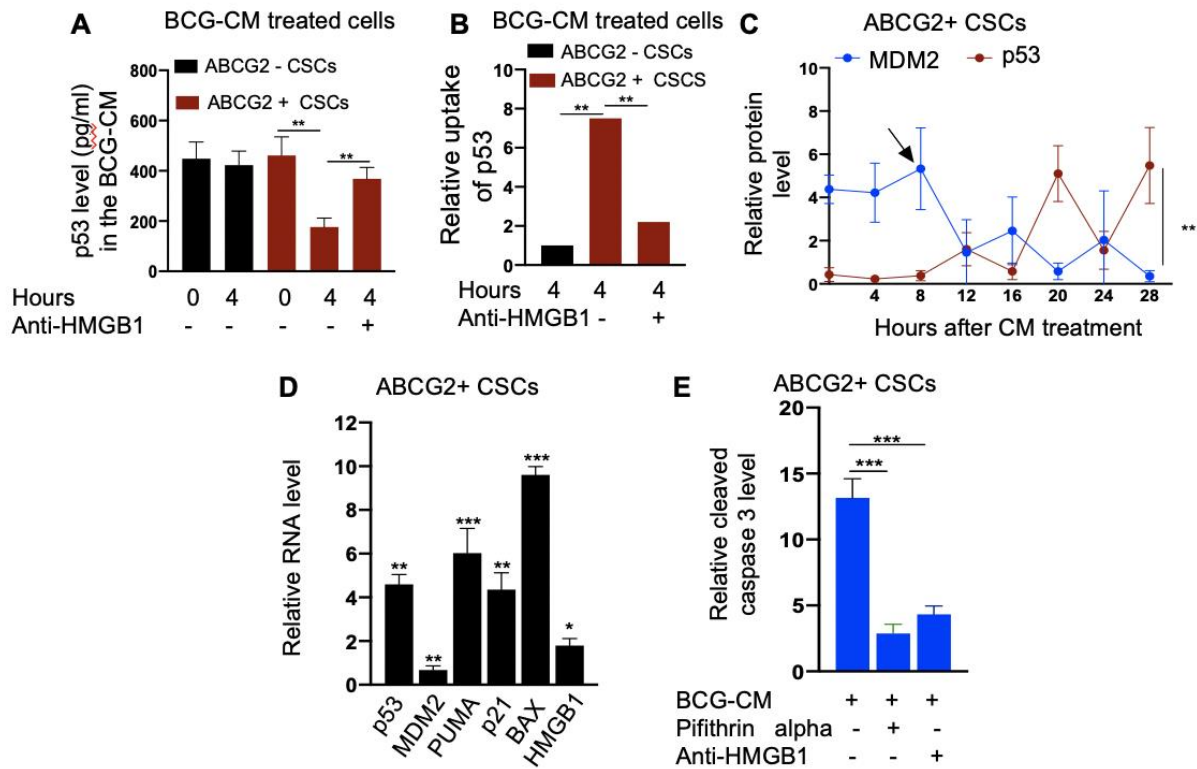

**Figure 6: Bystander apoptosis is characterized by the HMGB1/p53 complex mediated apoptosis.**

**A.** The histogram is showing p53 uptake by the ABCG2+ CSCs and ABCG2- CSCs with or without anti-HMGB1 after 4 hours of treatment with BCG-CM. The p53 was measured in the CM by ELISA. **B.** Protein uptake assay result: the relative uptake of p53 is measured in ABCG2+ CSCs versus ABCG2- CSCs. The absolute uptake of p53 by ABCG2+ CSCs was compared with that of ABCG2- CSCs to obtain fold-change. **C.** The data shows return of p53/MDM2 oscillation in non-infected ABCG2+ CSCs after 12 hours of BCG-CM treatment. The fold change in the protein levels of p53 and MDM2 (measured by ELISA) represents p53/MDM2 oscillation. **D.** Histogram is showing the induction of p53 related apoptotic genes as well as HMGB1 gene in ABCG2+ CSCs following 28 hours of treatment with BCG-CM. The real-time PCR data were compared with untreated ABCG2+ CSCs to obtain fold change. **E.** The histogram shows cleaved caspase 3 level (measured by ELISA) in ABCG2+ CSCs treated with BCG-CM with or without pifithrin alpha (2  $\mu$ M in DMSO for 48 hours) or anti-HMGB1 (10ug/ml for 48 hours; isotype control of same dose). Data represent means

360  $\pm$  SEM (A-E).  $N=3$  independent experiments (A-E). \* $p<0.05$ , \*\* $p<0.01$ , \*\*\*  $p<0.001$  (student  $t$ -  
361 *test*).

362

363 **Toll like receptor 2 (TLR 2) and 4 are involved in HMGB1/p53 complex mediated bystander**  
364 **apoptosis**

365 Next, we examined the potential mechanism of the HMGB1/p53 molecular complex uptake  
366 into the ABCG2+ CSCs for the induction of bystander apoptosis. Considering that TLR 2 and 4 are  
367 well known receptor for exogenous HMGB1, we reasoned that these two receptors may endocytose  
368 the HMGB1/p53 complex into the cells (Figure 7A) [47]. Indeed, neutralizing antibodies against  
369 TLR 2 and TLR 4, but not TLR 7 and TLR 9 (5 $\mu$ g/ml; Invivogen) significantly inhibited the BCG-  
370 CM mediated apoptosis of ABCG2+ CSCs in vitro (Figure 7B) and in vivo (Figure 7C). Moreover,  
371 both confocal imaging and biochemical assay showed a marked reduction in caspase 3 expres-  
372 sion/activity in ABCG2+ CSCs treated with neutralizing antibody against TLR 2/4 (Figure 7D-F).  
373 These data suggest that TLR 2/4 may be involved in BCG-CM mediated bystander apoptosis.

374 To further investigate the role of TLR2/4 in the uptake of HMGB1/p53 complex, we revisit-  
375 ed the initial finding that ABCG2- CSCs are less sensitive to BCG-CM mediated bystander apopto-  
376 sis than ABCG2+ CSCs (Figure 1 A and Figure 8A). We reasoned that ABCG2- CSCs may express  
377 low level of TLR 2/4 compared to ABCG2+ CSCs leading to the less uptake of the HMGB1/p53  
378 complex. As expected, ABCG2- CSCs expressed 4-6-fold lower level of TLR 2 and TLR 4 gene as  
379 well as protein expression (Figure 8B-C). However, there is no significant difference in expression  
380 of TLR7 and TLR 9 in ABCG2+ CSCs vs ABCG2- CSCs. Over-expression of TLR2/4 (Figure 8D)  
381 led to 2-fold increase in bystander apoptosis and associated 6-fold increase in the uptake of  
382 HMGB1/p53 complex (Figure 8E-F). Additionally, this TLR2/4 dependent increase in bystander  
383 apoptosis is markedly reduced following inhibition of p53, or neutralizing of HMGB1 in the BCG-

384 CM (Figure 8E-F). These results indicate that TLR 2 and TLR 4 are involved in the HMGB1/p53  
385 complex mediated bystander apoptosis.

### 386 **TSS phenotype amplifies the BCG-CM mediated bystander apoptosis**

387 We noted that bystander apoptosis was significantly less in the TLR2 overexpressed  
388 ABCG2- CSCs than the ABCG2+ CSCs (Figure 8F), although the HMGB1/p53 (present in the  
389 BCG-CM) uptake was similar (Figure 6B and Figure 8F). We hypothesize that in the ABCG2+  
390 CSCs which are of TSS phenotype, the HMGB1/p53 apoptotic signal may be amplified as a part of  
391 the CSC niche defense mechanism. Thus, we expect that the p53 concentration in the CM of  
392 ABCG2+ CSCs will increase after initial decline. Whereas in the SP cells or and TLR2/4 overex-  
393 pressing ABCG2- CSCs which do not exhibit TSS phenotype, the death signal would not be ampli-  
394 fied. Indeed, we found that the p53 concentration in the ABCG2+ CSCs exhibited a sharp increase  
395 by 2.5-fold between 8-16 hours of BCG-CM treatment after initial decline in 4 hours, suggesting  
396 the release of fresh HMGB1/p53 complex by the apoptotic cells. Whereas, the p53 concentration in  
397 the culture supernatant of SP cells and TLR2/4 overexpressing ABCG2- CSCs did not increase be-  
398 tween 8-16 hours of BCG-CM treatment (Figure 9A). Moreover, we did the co-IP assay of  
399 ABCG2+ CSCs which showed increase in HMGB1 bound p53 by 3-fold (160 +/- 22 ng/ml versus  
400 485 +/- 32 ng/ml; n= 4; p = 0.02) between 8 and 16 hours of BCG-CM treatment (data not shown).  
401 This data further confirms the release of fresh HMGB1/p53 complex by the BCG-CM treated  
402 ABCG2+ CSCs. Importantly, the culture supernatant containing this high level of HMGB1/p53  
403 complex further induced bystander apoptosis to another untreated population of ABCG2+ CSCs  
404 (data not shown), suggesting amplification of the original alarm/death signal.

405

406

407

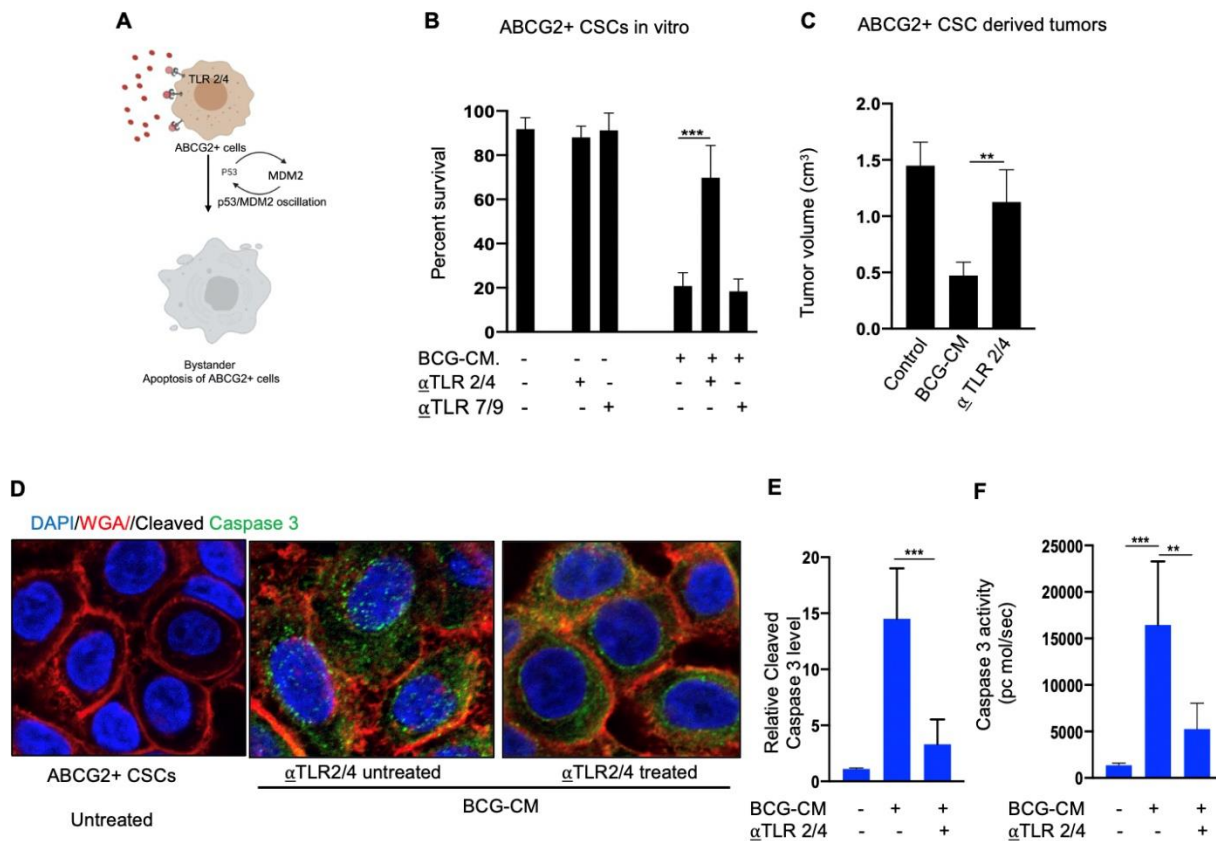

408

409

410 **Figure 7: Bystander apoptosis is mediated by TLR 2 and 4** *A. Hypothesis: TLR 2/4 are required*  
 411 *for the execution of HMGB1/p53 complex mediated bystander apoptosis. B. Relative cell viability*  
 412 *of BCG-CM treated (72 hours) ABCG2+ CSCs pretreated with TLR neutralizing antibodies. C. The*  
 413 *histogram is showing the tumor volume in BCG-CM treated and TLR neutralizing Abs pretreated*  
 414 *mice group. D. Immunofluorescence labeling of apoptotic ABCG2+ CSCs is showing reduction of*  
 415 *cleaved caspase 3 staining in the cells pre-treated with TLR 2/4 neutralizing antibodies (Dapi, nu-*  
 416 *clear stain; WGA, cell membrane stain). Magnification 20x. E&F. The histograms are showing*  
 417 *corresponding protein level (ELISA) and enzymatic activity of Caspase-3. Data represents means  $\pm$*   
 418 *SEM (B & D-E). \*\*  $p < 0.001$ , \*\*\*  $p < 0.0001$ ;  $N = 3$ , student's  $t$  test.*

419

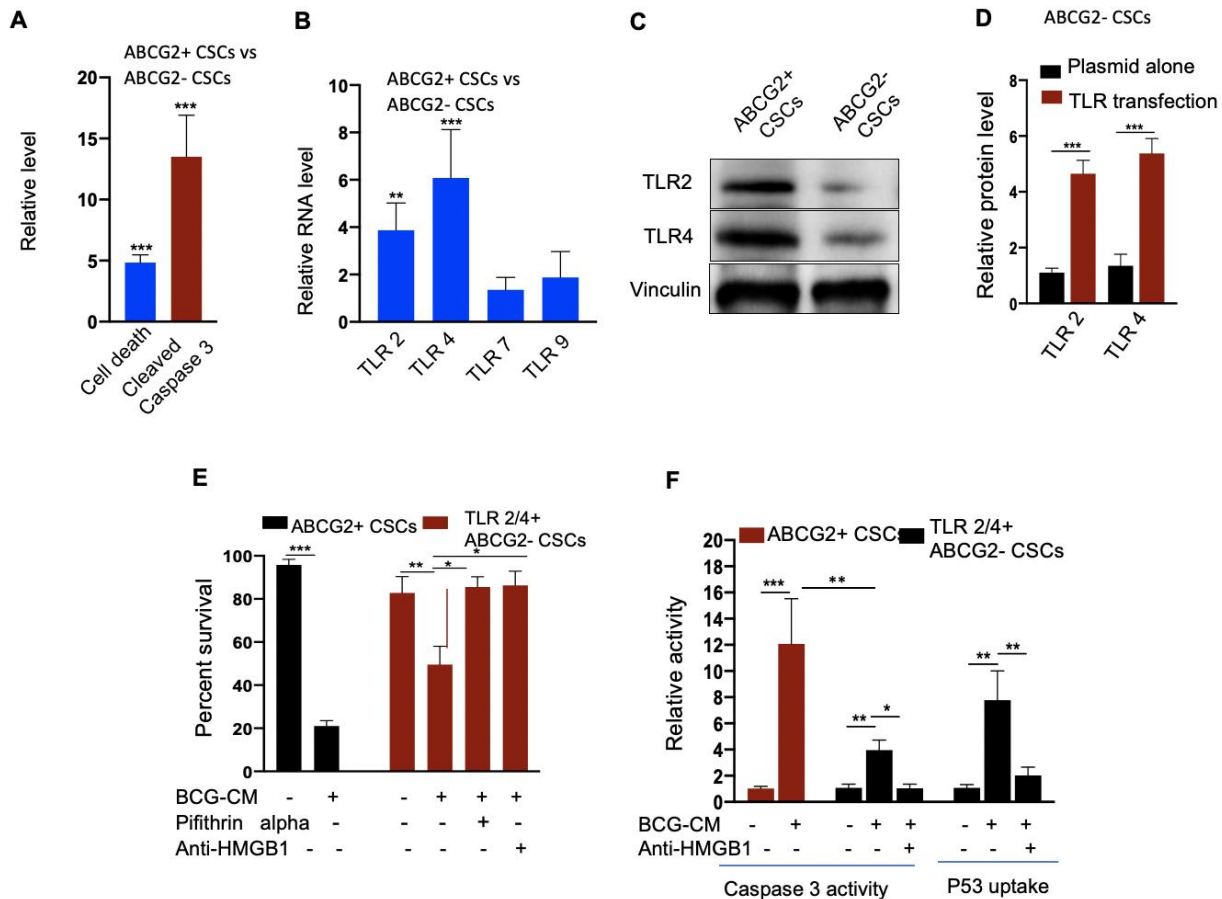

420  
 421 **Figure 8: A. TLR 2 and 4 are required for the internalization of HMGB1/p53 complex into the**  
 422 **CSCs. A. ABCG2- CSCs are significantly less susceptible to BCG-CM mediated cell death and by-**  
 423 **stander apoptosis. B. Real time PCR data shows fold change in RNA expression of TLR 2, 4, 7 and**  
 424 **9 in ABCG2+CSCs vs. ABCG2- CSCs. C. Western blot shows TLR 2/4 expression in ABCG2+CSCs**  
 425 **vs. ABCG2- CSCs. D. TLR 2 and 4 expressions in ABCG2- CSCs as measured by ELISA. E. TLR 2**  
 426 **& 4 overexpressing ABCG2- CSCs show BCG-CM mediated bystander apoptosis that can be re-**  
 427 **duced by inhibiting p53, and or neutralizing HMGB1 activity. ABCG2+ CSCs served as control for**  
 428 **BCG-CM potency. F. The Caspase 3 activity was measured after 48 hours whereas p53 uptake ac-**  
 429 **tivity was measured after 4 hours of BCG-CM treatment. ABCG2+ CSCs served as control for**  
 430 **BCG-CM potency. \* $p < 0.05$ , \*\*  $p < 0.001$ , \*\*\*  $p < 0.0001$ ,  $N = 3$ , student's  $t$  test (8A, B, D, F), One-**  
 431 **Way ANOVA (8E-F).**

432 **Discussion:**

433 Cancer stem cells (CSCs) promote invasion, metastasis, and drug resistance. CSCs may re-  
434 side in the hypoxic niche, and reprogram to a highly aggressive phenotype; tumor stemness switch  
435 (TSS) phenotype. Therefore, targeting these CSCs in the hypoxic niche with the existing therapeu-  
436 tic strategies is clinically challenging. Here, we demonstrate that post hypoxia ABCG2+ CSCs of  
437 oral squamous cell carcinoma (OSCC) exhibit pyroptosis when infected with BCG. The CM of  
438 BCG-infected ABCG2+ CSCs is capable of inducing bystander apoptosis of non-infected CSCs by  
439 releasing a death signal, the HMGB1/p53 complex. This death signal then induces p53 mediated  
440 apoptosis of bystander cancer cells in a TLR 2 and 4 dependent manners. Thus, our work indicates  
441 that pathogen infected CSC of TSS phenotype releases death signal that eliminates the nearby  
442 CSCs. We suggest this form of pathogen-induced bystander apoptosis (PIBA) as a novel mecha-  
443 nism of TSS phenotype mediated “stem cell niche” defense mechanism that we recently described  
444 in virus infected MSCs [25].

445 PIBA is a part of the innate immune defense mechanism that protects host cells from invad-  
446 ing pathogens [14]. Kelly DM *et al* reported *Mycobacteria* mediated PIBA in macrophages; where  
447 *Mtb* infected macrophages exert PIBA by direct cell to cell contact [15]. The HIV infected CD4+ T  
448 cells exert PIBA, which is mediated by the viral envelope protein [28]. We speculated that PIBA  
449 may be involved in stem cell niche defense mechanism, which we recently reported in virus-  
450 infected lung alveolar MSCs [25]. Thus, bystander apoptosis may represent a stem cell niche de-  
451 fense mechanism against pathogen invasion in the niche, whereby uninfected potential niche cells  
452 are eliminated to limit pathogen’s invasion. We speculated that like normal stem cell niche, CSCs  
453 may also exert a PIBA based niche defense mechanism, which may be exploited to eliminate CSCs  
454 in their niches.

455 BCG being an FDA-approved immunotherapy in invasive bladder cancer we wanted to ex-  
456 plore a putative BCG-induced CSC niche defense mechanism. The *Mtb-m18b* strain that showed

457 activation of stem cell niche defense by MSCs [25] served as positive control. Thus, the CSCs of  
458 several cell lines that we previously characterized for the TSS phenotype (SPm hox enriched in  
459 ABCG2<sup>+</sup> CSCs) including oral cancer, breast cancer and lung cancer were infected with *Mtb-m18b*  
460 as well as BCG to evaluate PIBA. To evaluate if the pathogen can induce bystander apoptosis in  
461 CSCs without TSS phenotype, we used ABCG2<sup>-</sup> CSCs. We found that the pathogen replicated in-  
462 tracellular to ABCG2<sup>+</sup> CSCs and the CM of these cells showed anti-bacterial activity as well as  
463 bystander cell death in freshly obtained ABCG2<sup>+</sup> CSCs (Figure 1). Whereas, the pathogens did not  
464 infect and replicate intracellular to ABCG2<sup>-</sup> CSCs (Figure 2); CM of these infected cells did not  
465 induce bystander apoptosis of untreated corresponding cancer cell phenotype (Figure 1), suggesting  
466 that PIBA is limited to TSS phenotype only. Therefore, we used post-hypoxia/oxidative stress  
467 ABCG2<sup>+</sup> CSCs of SCC-25 cell line to further investigate the molecular mechanism of PIBA. We  
468 found that the BCG-CM treated ABCG2<sup>+</sup> CSCs was associated with significant up-regulation of  
469 caspase-1 and gasdermin D on day-12 (Figure 2). These results confirm that the pathogens selec-  
470 tively infect, replicate and then induce pyroptosis in the ABCG2<sup>+</sup> CSCs versus ABCG2<sup>-</sup> CSCs.  
471 The conditioned media (CM) from the day-12 infected ABCG2<sup>+</sup> CSCs activated a caspase1/3 me-  
472 diated apoptosis in the freshly isolated ABCG2<sup>+</sup> CSCs, confirming PIBA. Notably, the treatment of  
473 infected ABCG2<sup>+</sup> CSCs with disulfiram (an inhibitor of pyroptosis) significantly reduced pyropto-  
474 sis. Moreover, the CM-of disulfiram treated ABCG2<sup>+</sup> CSCs failed to induce bystander apoptosis.  
475 These results suggested that during pathogen induced pyroptosis, some soluble factors were re-  
476 leased, and that mediated bystander apoptosis. We identified the HMGB1/p53 complex as a soluble  
477 factor that mediated bystander apoptosis. Subsequent findings suggest that ABCG2<sup>+</sup> CSCs under-  
478 going bystander apoptosis releases HMGB1/p53 complex into the culture supernatant, thus amplify  
479 the bystander apoptotic signal. Whereas, SP cells as well as ABCG2<sup>-</sup> CSCs undergoing bystander  
480 apoptosis failed to release HMGB1/p53 complex into the culture supernatant. This may explain the



481 reason of low level of bystander apoptosis in this cell phenotype (Figure 1). We note that detailed  
482 molecular investigations are needed to confirm the mechanism of bystander apoptosis.

483 The HMGB1 has potent immuno-suppressive [29] and pro-survival properties as it activates  
484 nuclear factor kappa B (NF- $\kappa$ B) via TLR signalling pathways. However, HMGB1 may form com-  
485 plex with p53, and this complex can regulate apoptosis and autophagy in human colon cancer cell  
486 line HCT116 [26]. Whereas, HMGB1/p53 complex may mediate altruistic cell death in the human  
487 Embryonic Stem Cells (hESC) derived ASC phenotype characterized by the activation of  
488 p53/MDM2 oscillation [24]. We consider this altruistic cell death as an important component of the  
489 putative ASC based stem cell niche defense mechanism [24], [25]. In this context, our findings of  
490 BCG-CM mediated HMGB1/p53 release and the activation of p53/MDM2 oscillation may be  
491 viewed as a part of the ASC based stem cell niche defense mechanism being activated by TSS phe-  
492 notype of ABCG2+ CSCs. Further investigation is required to find out whether the activation of  
493 ASC based stem cell niche defense mechanism could be exploited as a novel therapeutic strategy to  
494 target CSCs in their niches.

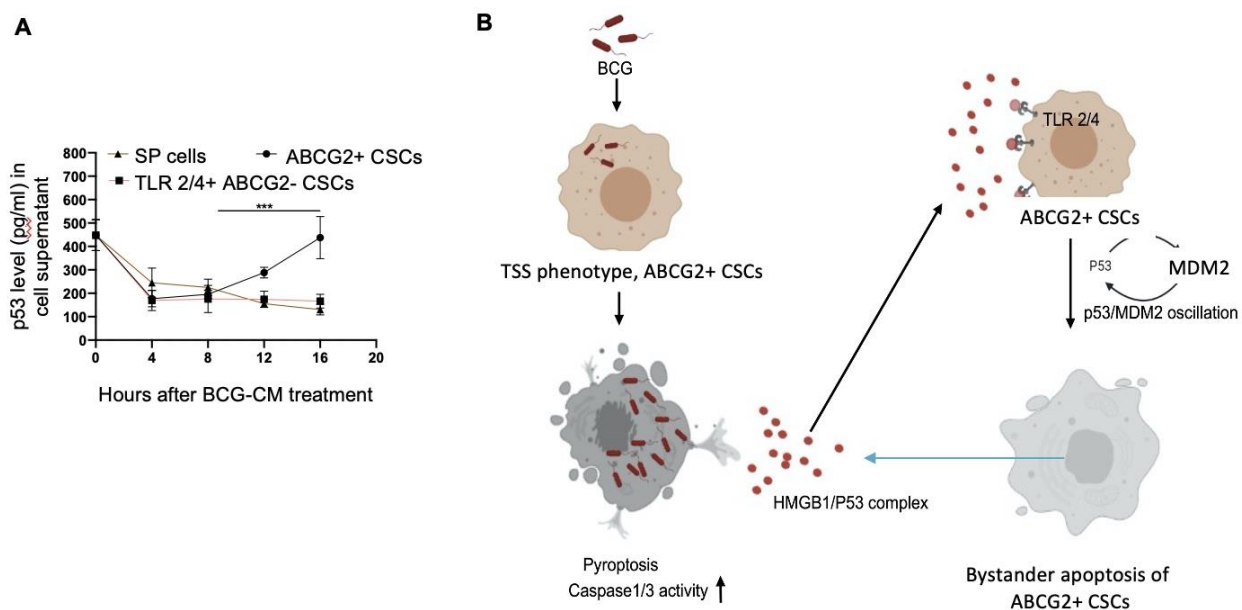

495 **Figure 9: TSS phenotype can amplify the pathogen induced bystander apoptosis (PIBA).** **A.** The  
496 *p53 uptake assay in the culture supernatant was measured from 0-16 hours of BCG-CM treatment*  
497 *in the cells. The SCC-25 SP cells were obtained as described in figure 1.* **B.** *Potential mechanism*  
498 *of altruistic niche defense of CSCs against BCG infection. In the infected CSCs, as part of the ASC*  
499 *based niche defense mechanism [25], [40], [53], HMGB1 form a complex with cytoplasmic p53 to*  
500 *make an, “altruistic cell death signal”. The nature of the HMGB1 and p53 binding is not yet clear,*  
501 *but may form a stable complex as previously shown [30]. The TLR4, which is known to participate*  
502 *in receptor-mediated endocytosis, and possibly TLR2, internalizes the HMGB1/p53 complex lead-*  
503 *ing to the induction of altruistic cell death signaling characterized by p53/MDM2 oscillation and*  
504 *activation of p53-induced pro-apoptotic genes. The ABCG2+ CSCs undergoing bystander apopto-*  
505 *sis releases the HMGB1/p53 death complex, amplifying the altruistic death signal. This entire*  
506 *mechanism can be considered as pathogen induced bystander apoptosis (PIBA) and innate defense*  
507 *mechanism of stem cell niche. Although, in vitro, PIBA target only the TSS phenotype, in vivo, PI-*  
508 *BA may target the other cancer cell phenotype, as demonstrated by the marked anti- tumor activity*  
509 *of BCG-CM [Figure 3D].*

510 The TLR-2 and 4 may be involved in this putative TSS phenotype mediated niche defense  
511 mechanism as the inhibition of these two receptors significantly reduce bystander apoptosis of  
512 ABCG2+ CSCs. The TLRs are an integral part of innate immune defense mechanism. However, in  
513 cancer, TLRs act as a double edged sword in either favoring stemness [10], [31], [32] or apoptosis  
514 [33]. BCG activates TLR2/4 in foam macrophages and T cells to induce metabolic reprogramming  
515 [34], and T cell response [35]. In the bladder cancer cells, BCG was shown to induce apoptosis via  
516 TLR-7 [56]. However, in our study, we found the involvement of TLR2/4, but not TLR 7 in the PI-  
517 BA of ABCG2+ CSCs. TLR 2 and 4 are surface receptors, and their cellular signaling mechanisms  
518 are mediated primarily by MYD88 adaptor protein [31], [32]. TLR 4 also mediates endocytosis [48]  
519 and therefore, may be capable of internalizing the HMGB1/p53 complex. We propose that the

520 HMGB1/p53 complex may internalize via TLR 4 and TLR 2 into the cytoplasm of CSCs, and then  
521 activate endogenous p53 for the induction of p53/MDM2 oscillation (Figure 9). Future studies are  
522 required to unravel the role of TLR2 and 4 in the internalization of HMGB1/p53 complex into the  
523 ABCG2+ CSCs and in the induction of p53/MDM2 oscillations.

524 During the last two decades, various strategies have been explored to activate p53 in tumor  
525 cells including small molecules that can disrupt MDM2, inhibit nuclear translocation, and or re-  
526 verse mutant to wild type conformation. However, none of these mechanisms involve the induction  
527 of p53/MDM2 oscillation. An alternative mechanism could be the targeting molecular pathways  
528 that suppress p53 in CSCs. Using EU-MYC model of T-cell acute lymphoblastic leukaemia (T-  
529 ALL), we reported that SCA1+ CSCs use MYC- hypoxia Inducible Factor 2 $\alpha$  (HIF-2 $\alpha$ ) stemness  
530 pathway to suppress p53 and decrease ROS production [1]. The MYC-HIF-2 $\alpha$  stemness pathway is  
531 also active in the ABCG2+ CSCs of SCC-25 cell line [41]. In hESCs exhibiting altruistic behavior,  
532 the HIF-2 $\alpha$  stemness pathway was activated and inhibition of the pathway led to the induction of  
533 p53/MDM2 oscillation [24]. Whether the BCG-CM mediated p53/MDM2 oscillation of ABCG2+  
534 CSCs is the result of inhibiting the MYC-HIF-2 $\alpha$  stemness pathway is now under active investiga-  
535 tion.

536 It is critical to target the CSC population in a tumor. Recent developments in the field of  
537 CSC targeting therapeutics include several approaches such as targeting CSC surface markers [36],  
538 and targeting CSC signaling cascades like Notch, Hedgehog, Wnt, NF- $\kappa$ B [37] However, none of  
539 these strategies are showing encouraging results in clinical trials. Hence, the PIBA of CSCs may  
540 have a potential significance as a novel strategy to target CSCs.

541 In Summary, here we provide experimental evidences that the TSS phenotype of SCC-25  
542 derived CSCs exhibit niche defense against BCG infection. We found that the CM of BCG-infected  
543 CSCs release HMGB1/p53 complex, which then induces p53/MDM2 oscillation in uninfected  
544 CSCs of TSS phenotype. This bystander apoptosis can be inhibited by neutralizing antibodies

545 against HMGB1, TLR 2 and TLR 4, or small molecular inhibitor of p53. We speculate that the  
546 BCG-induced bystander apoptosis is a part of the recently identified ASC based stem cell niche de-  
547 fense mechanism against pathogen invasion. Understanding this TSS phenotype exhibiting CSC  
548 mediated niche defense may help to gain insight about tumor progression, as well as develop inno-  
549 vative strategies to target CSCs in their niches.

## 550 **Materials and methods**

551 **Bacterial strains and Culture:** All the necessary experimental procedures were undertaken inside  
552 BSC-class II facility in accordance with guidelines of “Institutional Bio-safety Committee” of Ka-  
553 viKrishna Laboratory. BCG strain (ATCC<sup>®</sup> 35737<sup>TM</sup>) was obtained from the American Type Cul-  
554 ture Collection (ATCC) and grown in Difco<sup>TM</sup> Middlebrook 7H9 broth (Becton Dickinson). The  
555 media contained 0.5% glycerol, 0.06% Tween-80, and 10% oleic acid albumin dextrose catalase  
556 (OADC), BD, USA). Streptomycin-auxotrophic mutant *Mtb strain18b* (gifted by Prof. Stewart T.  
557 Cole, Ecole Polytechnique Federale de Lausanne, Lausanne, Switzerland) was cultured in 7H9 me-  
558 dium (Difco, BD Biosciences, Franklin Lakes, NJ) supplemented with Middlebrook albumin-  
559 dextrose-catalase, 0.5% glycerol and 0.06% Tween 80 (Sigma, St. Louis, MO) until an OD of ap-  
560 proximately 1 was obtained. We added 50µg/ml of streptomycin sulfate into the *Mtb-m18b* culture  
561 medium for bacterial growth [39]. GFP tagging procedure was performed as described earlier [39],  
562 [20]. The bacteria were prepared as single cell suspension in RPMI media as described [39] before  
563 being used to infect CSCs.

564 **Cancer Cell culture and sorting of CSCs with TSS phenotype:** SKN-BE-2, HOS and RH4, H-  
565 146, LOVO, MCF-7, SCC-25 cell lines from American Type Culture Collection (ATCC CRL-  
566 1628) Manassas; VA were maintained as previously described [1], [19]. The SCC-25 cells were  
567 cultured in Dulbecco’s modified Eagle’s medium containing Ham’s F12 (DMEM F-12) in the ratio  
568 of 1:1. DMEM F-12 is enriched with 1.2g/L sodium bicarbonate, 2.5mM L-glutamine, 15mM  
569 HEPES and 0.5 mM sodium pyruvate (catalog no. 11330-057; GIBCO). The media was supple-

570 mented with 400ng/ml hydrocortisone (catalog no. H0888; SIGMA) and 10% fetal bovine serum  
571 (catalog no. 16000-044), used as Complete Isolation Media (CIM). The cells were maintained in a  
572 humidified atmosphere of 5% CO<sub>2</sub> at 37°C [19] and the other cell lines were also maintained as de-  
573 scribed previously [19]. Hypoxia/oxidative stress (<0.1% O<sub>2</sub>) was generated in a sealed container  
574 using BBL GasPak Plus anaerobic system enveloped with a palladium catalyst (Becton Dickinson,  
575 Cockeysville, MD) as described previously. To obtain TSS phenotype of CSCs, side population  
576 (SP) cells were flow cytometry sorted [19] and then exposed to 24 hours of hypoxia followed by 24  
577 hours of re-oxygenation. Then, migratory SP (SPm) and non-migratory SP (SPn) cells were collect-  
578 ed as previously described [19], [52]. The post hypoxia SPm cells or SPm (hox) cells exhibit TSS  
579 phenotype, and highly express ABCG2 [19], [52]. For the SCC-25 cell derived ABCG2<sup>+</sup> and  
580 ABCG2<sup>-</sup> CSCs, the post hypoxia/oxidative stress treated cells were first subjected to immunomag-  
581 netic sorting for EpCAM<sup>+</sup> cells by using EpCAM antibody (#ab 213500) conjugated with FITC by  
582 SiteClick antibody labeling kit. This EpCAM<sup>+</sup> cells were then expanded for 7 days in spheroidal  
583 culture media (serum free culture containing 20ng/ml EGF and BFGF) as described previously  
584 [19]. The ABCG2<sup>+</sup> CSCs were then immunomagnetically sorted by using the ABCG2 antibody  
585 (#ab 3380, Abcam), conjugated with PE by SiteClick antibody labeling kit as previously described  
586 [19]. For the immunomagnetic sorting, a PE sorting kit (#18554, Stem Cell Technologies, BC) was  
587 used. Noted that both ABCG2<sup>+</sup> and ABCG2<sup>-</sup> CSCs of SCC-25 cell lines expressed CD44, LDH1  
588 and CD133 equally [41].

589 **BCG and *Mtb-m18b* infection of ABCG2<sup>+</sup> CSCs and collection of BCG-CM:** The immuno-  
590 magnetically sorted cells were cultured in vitro for 48 hours, and then treated with BCG or *Mtb*-  
591 *m18b* with MOI 5:1 as previously described including treatment with amikacin 200 µg/ml to kill  
592 extracellular bacteria [39]. The infected cancer cells were then washed twice with serum-free  
593 RPMI, and incubated in the appropriate cell culture media for the desired time at 37°C and 5% CO<sub>2</sub>.  
594 The CM was collected at desired time starting from day 10 by adding fresh serum free 1 ml DMEM

595 per  $1 \times 10^5$  cells for 48 hours, and filter sterilized with 0.2 $\mu$ m filter, concentrated with Centricon  
596 centrifugal filter units (EMD Millipore) to 10X to prepare 0.1 ml CM containing 100 ng/ml protein.  
597 The CM was then utilized to treat fresh ABCG2+ CSCs to evaluate bystander apoptosis. To collect  
598 rifampicin (RIF) treated CM, the day-9 infected cells were treated with 2 $\mu$ g/ml rifampicin for 3  
599 days to kill intracellular bacteria as previously described [39].

600 ***In vivo* tumorigenicity assay:** All the necessary experimental procedures were undertaken in ac-  
601 cordance with approvals of Institutional Animal Ethics Committee of KaviKrishna Laboratory, and  
602 Gauhati University. To generate subcutaneous tumors,  $1 \times 10^5$  ABCG2+ CSCs of SCC-25 cells  
603 were mixed with Matrigel 100  $\mu$ l, and then injected subcutaneously to NOD/SCID mice following  
604 proper ethical permission as described. After 6 weeks, when the tumor reached 0.5 mm<sup>3</sup> size, the  
605 animals were locally injected with concentrated CM/week (2 ml concentrated to 0.1 ml containing  
606 0.5mg protein) into the tumor. The tumor size was measured with a caliper on a biweekly basis for  
607 10 weeks and tumor volume was determined using the formula  $0.5ab^2$ , where b is the smaller of the  
608 two perpendicular diameters as described [42]. After 10 weeks, tumors were dissociated and single  
609 cell suspension was obtained to perform clonogenic assay and to evaluate the frequency of  
610 ABCG2+ CSCs.

611 **Clonogenic assay:** The single cell suspension of dissociated tumors were freshly sorted via im-  
612 munomagnetic sorting and  $1 \times 10^3$  EpCAM+/ABCG2+ or EpCAM+/ABCG2- CSCs were seeded in  
613 methylcellulose medium (Methocult M3134, Stem Cell Technologies) as described previously [1],  
614 [19]. The cells were seeded in 6 well plates, incubated at 37°C and 5% CO<sub>2</sub>. The colonies were  
615 counted after two weeks [1].

616 **Real-Time PCR (qPCR):** The real time PCR was performed as described previously using the  
617 TaqMan Gene expression assay [1]. The glyceraldehyde 3-phosphate dehydrogenase (GAPDH)  
618 was used as an endogenous control and RNA was quantified by the delta delta CT method using Q-

619 Rex software version 1.1 (Rotor-Gene Q-Qiagen, New Delhi, India). The following TaqMan gene  
620 expression primers were used. Human: ABCG2 (Hs00184979\_m1), TLR 2 (Hs02621280\_s1), TLR  
621 4 (Hs00152939\_m1), TLR 7 (Hs01933259\_s1), TLR 9 (Hs00370913\_s1), p53 (Hs01034249\_m1),  
622 p21 (Hs00355782\_m1), PUMA (Hs00248075\_m1), Bax (Hs00180269\_m1), and GAPDH  
623 (Hs00266705\_g1), MDM2 (Hs01066930\_m1), HMGB1 (Hs01923466\_g1).

624 **Pyroptosis assay:** The pyroptosis of BCG infected ABCG2+ CSCs was evaluated by measuring  
625 cleaved caspase 1 level by ELISA, Caspase 1 activity and lactate dehydrogenase (LDH) release as-  
626 say. The Caspase 1 activity assay was performed by using the Caspase 1 substrate Ac-YVAD-AFC  
627 (Cayman Chemical, An Arbor, Michigan, USA) as previously described [44], [45]. Briefly, cell ly-  
628 sate prepared for the Caspase-3/7 assay was mixed with Ac-YVAD-AFC, and after an hour the flu-  
629 orescence signal of cleaved AFC was detected at 400 nm excitation and 505 nm emission using flu-  
630 orescence spectrofluorometer (Agilent Varian Cary Eclipse, Hyderabad, India). For the LDH re-  
631 lease assay, the BCG-CM was subjected to LDH measurement by the LDH-cytotoxicity assay kit  
632 (#ab65393, Abcam) as per manufacturer instruction with slight modifications. Briefly, 25  $\mu$ l of  
633 BCG-CM was mixed with 25  $\mu$ l of LDH assay reagent, and the assay reaction was stopped after 30  
634 minutes by adding 25  $\mu$ l of stop solution. The OD value at 450 nm was taken using iMark Micro-  
635 plate Absorbance Reader (Biorad, Gurgaon, India). Some of the assay results were confirmed by  
636 Decker method [57]. To further confirm pyroptosis, LDH was also measured after treating the cells  
637 with disulfiram 50 nM/twice daily or Caspase 1 inhibitor z-YVAD-fmk.

638 **Cellular apoptosis or caspase-3/7 activity assay:** The assay was performed as described previous-  
639 ly by using the caspase-3/7 substrate Ac-DEVD-AMC [51], [45], [19], [1]. Briefly, 100  $\mu$ g/ml of  
640 cell lysate was prepared by lysing  $5 \times 10^3$  -  $1 \times 10^5$  cells using a modified 1X RIPA Buffer: Tris-  
641 HCl (20mM; pH 7.5), NaCl (155 mM), 1 mM Na<sub>2</sub> EDTA (1 mM EDTA from 100 mM stock solu-  
642 tion in H<sub>2</sub>O, pH 7.4), EGTA (1.5 mM EGTA), Triton (1.2%), sodium Pyrophosphate (25 mM), So-

643 dium Fluoride (25 mM),  $\beta$ -glycerophosphate (1 mM), activated sodium orthovanadate ( $\text{Na}_3\text{VO}_4$ ) 1  
644 mM (from 200 mM stock solution), 1  $\mu\text{g}/\text{ml}$  leupeptin, 1  $\mu\text{g}/\text{ml}$  aprotinin, and 1  $\mu\text{g}/\text{ml}$  pepstatin. 1  
645 mM Phenylmethylsulfonyl fluoride (PMSF) (200 mM stock solution prepared in isopropanol and  
646 stored at RT) and 5mM dithiothreitol (DTT) was added immediately before use. Cells in a 1.5 ml  
647 microcentrifuge tube were centrifuged in ice-cold phosphate buffered saline (PBS), and the pellet  
648 was treated with 50  $\mu\text{l}$  of RIPA buffer, kept on ice for 10 minutes, and stored at  $-80^\circ\text{C}$ . After a few  
649 days, lysate was thawed on ice, equal volume of freshly prepared RIPA buffer was added, vortexed  
650 for 1 minute, and kept on ice for 5 minutes, then centrifuged at  $4^\circ\text{C}/5000$  RPM, and the supernatant  
651 was transferred to a fresh tube as 25  $\mu\text{l}$  aliquot and stored at  $-80^\circ\text{C}$  for future use. To perform the  
652 assay, a 25  $\mu\text{l}$  aliquot was thawed on ice, and 200  $\mu\text{l}$  of Ac-DEVD-AMC (Cayman Chemical, An  
653 Arbor, Michigan, USA) substrate (prepared by adding 0.1 ml of 1mg Ac-DEVD-AMC in DMSO to  
654 4 ml of the lysis buffer containing freshly added DTT and PMSF) was added on to it. The mixture  
655 was vortexed, and the enzymatic activity was measured by detecting cleaved substrate linked to  
656 fluoropore using a fluorescence spectrofluorometer (Agilent Varian Cary Eclipse, Hyderabad, In-  
657 dia) as described previously [45].

658 **Caspase inhibition:** The experiment was performed as previously described [1], [19], [45]. Anti-  
659 Caspase 8 is the Z-IETD- FMK (Fluoromethyl ketone); R&D Systems #FMK007 and Anti-Caspase  
660 9 is Z-LEHD-FMK (#FMK 008). For both caspase inhibition experiment, 100  $\mu\text{M}$  (dissolved in  
661 DMSO) of each was added in the cell culture for 4 days. The medium was changed every second  
662 day.

663 **Inhibition of ferroptosis, necroptosis and autophagy:** Ferrostatin-1 (20  $\mu\text{M}$ ), necrostatin or RIP-I  
664 kinase (20  $\mu\text{M}$ ), and 3-Methyladenine (3-MA) of 5 mM was prepared in DMSO (from 100 mM  
665 stock). These reagent mixtures were used to inhibit ferroptosis, necroptosis and autophagy respec-  
666 tively. Reagents were obtained from Sigma-Aldrich; 2  $\mu\text{M}$  (in vitro) and neutralizing HMGB1 of  
667 10 $\mu\text{g}/\text{ml}$  were obtained from Biolegend (isotype control mouse IgG2a kappa, #16-4724, Biolegend.



668 **Enzyme Linked Immunosorbent Assay (ELISA):** The cell lysates were prepared by RIPA buffer  
669 and subjected to ELISA assay as described [45], [25]. The information about various ELISA kit and  
670 antibody details is given in supplementary method, Table 1. The absorbance was measured at 450  
671 nm using iMark Microplate Absorbance Reader (Biorad, Gurgaon, India).

672 **Western blot and co-immunoprecipitation:** Western blot analysis was done on a 4-12% sodium  
673 dodecyl sulfate–polyacrylamide gel electrophoresis (SDS-PAGE) gel and transferred to  
674 polyvinylidene difluoride (PVDF) membranes (Millipore-Sigma, Immobilon-P, Cat #  
675 IPVH20200) as previously described [1], [19]. Co-immunoprecipitation of the HMGB1-p53  
676 complex in the BCG-CM was performed following lab’s standard IP protocol [45], [1] using the  
677 protein A sepharose beads (GE Cat # 17-0780-01; Millipore-Sigma). The concentrated BCG-CM  
678 (containing 1.0 mg protein in the lysis buffer) was subjected to cross-linking by DTSSP  
679 (Thermofisher Scientific #21578) as per manufacturer instructions before performing IP. Prior to  
680 IP, samples were pre-cleared with Protein A Sepharose at 4<sup>0</sup>C for 3 hours with gentle shaking. A  
681 rabbit polyclonal antibody (10 ug of #ab 228624, Abcam) was used to allow HMGB1 immune  
682 complex to form (in 500 ul solution containing 1.0 mg protein), which was captured with 50%  
683 slurry of BSA blocked Protein A Sepharose beads. The immune complex was then eluted by  
684 boiling the beads in 2X SDS sample buffer, and the elutes were washed 4 times with 1X PBS with  
685 0.2% Tween 20. The elutes were subjected to WB probing with a mouse monoclonal antibody  
686 (#H00003146-M08; Novus Biologicals) against human HMGB1. To confirm the p53 IP, blots were  
687 stripped (Thermo Fisher Restore stripping buffer, Cat # 21059) and re-probed using p53 antibody  
688 (#2527, Cell Signaling Technology). Inputs representing 2.5% of the lysate subjected to  
689 immunoprecipitation was further subjected to WB for HMGB1 using the mouse monoclonal  
690 antibody. The Co-IP elutes (eluted with elution buffer containing glycine and Tris-HCL and 500  
691 mM NACL) were also subjected to ELISA to quantify p53 and HMGB1 proteins after the elutes

692 were neutralized by 10X PBS. Isotype control with a rabbit polyclonal IgG (ab #37415; Abcam)  
693 was run in parallel to the sample in each IP procedure.

694 **Silencing of p53:** The inhibition of p53 was achieved by Accell siRNA (Thermoscientific Dharma-  
695 con, Lafayette, CO, USA,) and by pifithrin- $\alpha$ , an inhibitor of p53 as described previously [19]. The  
696 Accell siRNA used for p53 was A-003329-22-0005. Briefly, the ABCG2+ CSCs ( $10^4$  cells/well in  
697 96-well plate) before treating with BCG-CM were treated with 1  $\mu$ M Accell siRNA as per manufac-  
698 turer instructions. After 72 hours of incubation at 37°C, gene silencing was confirmed using real  
699 time qPCR.

700 **Antibody blocking experiments:** The experiment was performed as previously described [1], [19],  
701 [45]. Anti-Fas monoclonal antibody (human, neutralizing) clone ZB4 (Sigma-Aldrich); Anti-human  
702 TNF-monoclonal antibody (MAB 210;R&D Systems, Minneapolis, MN); Anti-human  
703 TRAIL (clone RIK-2, Thermofisher Scientific, Waltham, MA);Anti-hLAP or TGF beta 1 (MAB  
704 246; R&D Systems, Minneapolis, MN);Anti-TLR2 (cloneTL2.1; BioLegend, San Diego, CA),  
705 and Anti-TLR4 (HTA125; BioLegend, San Diego, CA); Immunoglobulin G1 (IgG1) isotype con-  
706 trol antibodies were used at corresponding concentrations. Antibodies were added to BCG-CM,  
707 mixed well before adding to ABCG2+ CSC grown in 6-well culture plates. The abilities of the  
708 blocking antibodies to neutralize their ligands were determined by challenging Jurkat  
709 or undifferentiated THP-1 cells with the appropriate ligand in the presence of the antibody at the  
710 concentrations indicated above. Fas ligand (MAB050), TRAIL (375-TL-010), TGF-beta 1 (7754-  
711 BH-005) and TNF- alpha (210-TA) were obtained from R&D Systems, and the synthetic bacterial  
712 lipopeptide Pam3CysSerLys4 was obtained from Calbiochem. The cells were incubated with  
713 cycloheximide for 15 min before addition of the apoptotic stimulus.

714 **Statistical Analysis:** The statistical calculations were performed using either Student's t test or  
715 One-Way ANOVA with Dunnet *post-hoc* test by GraphPad Prism version 8.4.2). Data are ex-  
716 pressed as means  $\pm$  SEM; \* $p < 0.05$ , \*\* $p < 0.01$ , \*\*\*  $p < 0.001$ , \*\*\*\* $p < 0.0001$ .

717 **Acknowledgement:** We thank Dr. Antonio Campos Neto and Dr. Philip Stashenko, Forsyth Insti-  
718 tute, Cambridge for their valuable suggestions in this research work. We also thank Dr. Jyotirmoi  
719 Phukan, Gauhati Medical College and hospital and Dr. Anupam Sarma, B. Borooah Cancer Insti-  
720 tute for their valuable suggestions. We thank Mr. Biswajit Das and Mallika Maral for taking care of  
721 the animal facility. We thank the members of KaviKrishna Laboratory, Indian Institute of Technol-  
722 ogy Guwahati Research Park, Guwahati, Assam, India, Thoreau Laboratory for Global Health,  
723 M2D2, University of Massachusetts, Lowell, Massachusetts, and Department of Bioengineering  
724 and Technology, Gauhati University, Guwahati, Assam, India.

725 **Funding:** Funding was obtained from the Bill & Melinda Gates Foundation through the "Grand  
726 Challenges Exploration Initiatives" (B.D.), Laurel Foundation, USA (B.D.), the KaviKrishna Foun-  
727 dation (Assam, India) grants KKL/2014-1\_CSC (S.B., L.P., P. J. S, S. M. and S.G.), Department of  
728 Biotechnology India grant BT/PR22952/ NER/95/572/2017 (B.D.), and the KaviKrishna USA  
729 Foundation grants KKL/2018-2\_CSC (B.D., B.P., R. B. M.)

730 **Author contributions:** B.D. initiated and designed the study. B.D., S.B., B.P., L.P., P. J. S., S. M.,  
731 S.G., R. B. M., and H.L performed the in vitro and in vivo experiments. B.D., S.B., B.P., and L.P.  
732 analyzed data. B.D., S.B., L.P., and S.G. wrote the article. B.D., L.P., P.J.S., S.M., C.V.R., and  
733 D.B. edited the article.

734 **References:**

- 735 1. Das, B., et al., *MYC Regulates the HIF2alpha Stemness Pathway via Nanog and Sox2 to*  
736 *Maintain Self-Renewal in Cancer Stem Cells versus Non-Stem Cancer Cells.* Cancer Res,  
737 2019. **79**(16): p. 4015-4025.
- 738 2. Jabbour, E., J.E. Cortes, and H.M. Kantarjian, *Suboptimal response to or failure of imatinib*  
739 *treatment for chronic myeloid leukemia: what is the optimal strategy?* Mayo Clin Proc,  
740 2009. **84**(2): p. 161-9.

- 741 3. Conley SJ et al. *Antiangiogenic agents increase breast cancer stem cells via the generation*  
742 *of tumor hypoxia*. Proc Natl Acad Sci U S A. 2012 Feb 21;109(8):2784-9. doi:  
743 10.1073/pnas.1018866109. 4. Castagnoli, L., et al., *Cancer Stem Cells: Devil or Savior-*  
744 *Looking behind the Scenes of Immunotherapy Failure*. Cells, 2020. **9**(3).
- 745 5. Tsuchida, R., et al., *Cisplatin treatment increases survival and expansion of a highly*  
746 *tumorigenic side-population fraction by upregulating VEGF/Flt1 autocrine signaling*.  
747 Oncogene, 2008. **27**(28): p. 3923-34.
- 748 6. Martins-Neves, S.R., et al., *Chemotherapy induces stemness in osteosarcoma cells through*  
749 *activation of Wnt/beta-catenin signaling*. Cancer Lett, 2016. **370**(2): p. 286-95.
- 750 7. Hu, X., et al., *Induction of cancer cell stemness by chemotherapy*. Cell Cycle, 2012. **11**(14):  
751 p. 2691-8.
- 752 8. Bhuyan, R., et al., *Abstract 935: Oral cancer cells may hijack stem cell altruism to survive*  
753 *during extreme hypoxia, and exposure to chemotherapeutic drugs*. Cancer Research, 2016.  
754 **76**(14 Supplement): p. 935.
- 755 9. Talukdar J et al. *Migratory cancer side population cells induces stem cell altruism in bone*  
756 *marrow mesenchymal stem cells to resist therapy, and enhance tumorigenic potential of*  
757 *non-tumorigenic cells*. [abstract]. in Cancer Res, L.P.P.A. New Orleans, Editor. 2016 Apr  
758 16-20; : In: Proceedings of the 107th Annual Meeting of the American Association for  
759 Cancer Research; . p. 920.
- 760 10. Talukdar, J., et al., *Abstract 2681: Oral micro biome enhances stemness in oral cancer cells*  
761 *by activating Toll like receptor signaling*. Cancer Research, 2017. **77** (13 Supplement): p.  
762 2681-2681.
- 763 11. Akeel, I., et al., *Abstract 3821: Fusobacterium Nucleatum and HPV16 cooperate to*  
764 *reprogram the human primary oral keratinocyte to enhanced stemness state, a newly*

- 765 *identified pre-malignant cell state*. *Cancer Research*, 2020. **80** (16 Supplement): p. 3821-  
766 3821.
- 767 12. Huang, Y., et al., *Macrophage-mediated bystander effect triggered by tumor cell apoptosis*.  
768 *Mol Ther*, 2007. **15**(3): p. 524-33.
- 769 13. Muller, L., et al., *Bidirectional Crosstalk Between Cancer Stem Cells and Immune Cell*  
770 *Subsets*. *Front Immunol*, 2020. **11**: p. 140.
- 771 14. Labbe, K. and M. Saleh, *Cell death in the host response to infection*. *Cell Death Differ*,  
772 2008. **15**(9): p. 1339-49.
- 773 15. Kelly, D.M., et al., *Bystander macrophage apoptosis after Mycobacterium tuberculosis*  
774 *H37Ra infection*. *Infect Immun*, 2008. **76**(1): p. 351-60.
- 775 16. Pal B et al; Abstract 3903: *Targeting oral cancer stem cells in the hypoxic niche by BCG*  
776 *infected mesenchymal stem cells*. *Cancer Res* 1 July 2017; **77** (13\_Supplement):  
777 3903. <https://doi.org/10.1158/1538-7445.AM2017-3903>.17.Lattime, E.C., L.G. Gomella,  
778 and P.A. McCue, *Murine bladder carcinoma cells present antigen to BCG-specific CD4+*  
779 *T-cells*. *Cancer Res*, 1992. **52**(15): p. 4286-90.
- 780 18. Redelman-Sidi, G., et al., *Oncogenic activation of Pak1-dependent pathway of*  
781 *macropinocytosis determines BCG entry into bladder cancer cells*. *Cancer Res*, 2013. **73**(3):  
782 p. 1156-67.
- 783 19. Das, B., et al., *Hypoxia enhances tumor stemness by increasing the invasive and*  
784 *tumorigenic side population fraction*. *Stem Cells*, 2008. **26**(7): p. 1818-30.
- 785 20. Garhyan, J., et al., *Preclinical and Clinical Evidence of Mycobacterium tuberculosis*  
786 *Persistence in the Hypoxic Niche of Bone Marrow Mesenchymal Stem Cells after Therapy*.  
787 *Am J Pathol*, 2015. **185**(7): p. 1924-34.
- 788 21. Beckwith, K.S., et al., *Plasma membrane damage causes NLRP3 activation and pyroptosis*  
789 *during Mycobacterium tuberculosis infection*. *Nat Commun*, 2020. **11**(1): p. 2270.

- 790 22. de Queiroz NMGP et al. MyD88-dependent BCG immunotherapy reduces tumor and regulates tumor  
791 microenvironment in bladder cancer murine model. *Sci Rep.* 2021 Aug 2;11(1):15648. doi:  
792 10.1038/s41598-021-95157-6.
- 793 23. Kato, T., et al., *Bacillus Calmette-Guerin and BCG cell wall skeleton suppressed viability of*  
794 *bladder cancer cells in vitro.* *Anticancer Res*, 2010. **30**(10): p. 4089-96.
- 795 24. Das, B., et al., *HIF-2alpha suppresses p53 to enhance the stemness and regenerative*  
796 *potential of human embryonic stem cells.* *Stem Cells*, 2012. **30**(8): p. 1685-95.
- 797 25. Pathak, L., et al., *Coronavirus activates an altruistic stem cell mediated defense mechanism*  
798 *that reactivates dormant tuberculosis: implications in COVID-19 pandemic.* *Am J Pathol*,  
799 2021.
- 800 26. Livesey, K.M., et al., *p53/HMGB1 complexes regulate autophagy and apoptosis.* *Cancer*  
801 *Res*, 2012. **72**(8): p. 1996-2005.
- 802 27. Grover, A., et al., *Mycobacterial infection induces the secretion of high-mobility group box*  
803 *1 protein.* *Cell Microbiol*, 2008. **10**(6): p. 1390-404.
- 804 28. Garg, H., J. Mohl, and A. Joshi, *HIV-1 induced bystander apoptosis.* *Viruses*, 2012. **4**(11):  
805 p. 3020-43.
- 806 29. Wild, C.A., et al., *HMGB1 conveys immunosuppressive characteristics on regulatory and*  
807 *conventional T cells.* *Int Immunol*, 2012. **24**(8): p. 485-94.
- 808 30. Rowell, J.P., et al., *HMGB1-facilitated p53 DNA binding occurs via HMG-Box/p53*  
809 *transactivation domain interaction, regulated by the acidic tail.* *Structure*, 2012. **20**(12): p.  
810 2014-24.
- 811 31. Kaczanowska, S., A.M. Joseph, and E. Davila, *TLR agonists: our best frenemy in cancer*  
812 *immunotherapy.* *J Leukoc Biol*, 2013. **93**(6): p. 847-63.
- 813 32. Sato, Y., et al., *Cancer Cells Expressing Toll-like Receptors and the Tumor*  
814 *Microenvironment.* *Cancer Microenviron*, 2009. **2 Suppl 1**: p. 205-14.

- 815 33. Basith, S., et al., *Roles of toll-like receptors in cancer: a double-edged sword for defense*  
816 *and offense*. Arch Pharm Res, 2012. **35**(8): p. 1297-316.
- 817 34. Almeida, P.E., et al., *Mycobacterium bovis bacillus Calmette-Guerin infection induces*  
818 *TLR2-dependent peroxisome proliferator-activated receptor gamma expression and*  
819 *activation: functions in inflammation, lipid metabolism, and pathogenesis*. J Immunol,  
820 2009. **183**(2): p. 1337-45.
- 821 35. Kates, M., et al., *Intravesical BCG Induces CD4(+) T-Cell Expansion in an Immune*  
822 *Competent Model of Bladder Cancer*. Cancer Immunol Res, 2017. **5**(7): p. 594-603.
- 823 36. Ranji P, Salmani Kesejini T, Saeedikhoo S, Alizadeh AM. *Targeting cancer stem cell-*  
824 *specific markers and/or associated signaling pathways for overcoming cancer drug re-*  
825 *sistance*. Tumour Biol. 2016 Oct;37(10):13059-13075. doi: 10.1007/s13277-016-5294-  
826 5. 37. Clara JA, Monge C, Yang Y, Takebe N. *Targeting signalling pathways and the im-*  
827 *mune microenvironment of cancer stem cells - a clinical update*. Nat Rev Clin Oncol. 2020  
828 Apr;17(4):204-232. doi: 10.1038/s41571-019-0293-2.
- 829 38. Takebe N et al. *Targeting Notch, Hedgehog, and Wnt pathways in cancer stem cells: clini-*  
830 *cal update*. Nat Rev Clin Oncol. 2015 Aug;12(8):445-64. doi: 10.1038/nrclinonc.2015.61.
- 831 39. Das, B., et al., *CD271(+) bone marrow mesenchymal stem cells may provide a niche for*  
832 *dormant Mycobacterium tuberculosis*. Sci Transl Med, 2013. **5**(170): p. 170ra13.
- 833 40. Das B. *Science Behind Squalene*. Canada: Toronto Medical Publishing, 2000:187; ISBN 1–  
834 890412-95–3. Available at [http://www.scienceforlife.](http://www.scienceforlife.eu/tekst%20sciencebehindsqualene.htm)  
835 [eu/tekst%20sciencebehindsqualene.htm](http://www.scienceforlife.eu/tekst%20sciencebehindsqualene.htm).
- 836 41. Li H et al; Abstract 1529: *MYC and HIF-2alpha cooperates in oral squamous carcinoma*  
837 *cell self-renewal during hypoxia*. Cancer Res 1 August 2015; 75 (15\_Supplement):  
838 1529. <https://doi.org/10.1158/1538-7445.AM2015-1529>

- 839 42. Das, B., et al., *Squalene selectively protects mouse bone marrow progenitors against*  
840 *cisplatin and carboplatin-induced cytotoxicity in vivo without protecting tumor growth.*  
841 *Neoplasia*, 2008. **10**(10): p. 1105-19.
- 842 43. Patrawala, L., et al., *Side population is enriched in tumorigenic, stem-like cancer cells,*  
843 *whereas ABCG2+ and ABCG2- cancer cells are similarly tumorigenic.* *Cancer Res*, 2005.  
844 **65**(14): p. 6207-19.
- 845 44. Wang, Y.C., et al., *Caspase-1-dependent pyroptosis of peripheral blood mononuclear cells*  
846 *predicts the development of sepsis in severe trauma patients: A prospective observational*  
847 *study.* *Medicine (Baltimore)*, 2018. **97**(8): p. e9859.
- 848 45. Das, B., et al., *A hypoxia-driven vascular endothelial growth factor/Flt1 autocrine loop*  
849 *interacts with hypoxia-inducible factor-1alpha through mitogen-activated protein*  
850 *kinase/extracellular signal-regulated kinase 1/2 pathway in neuroblastoma.* *Cancer Res*,  
851 2005. **65**(16): p. 7267-75.
- 852 46. Pal B et al. *Stem cell altruism may serve as a novel drug resistance mechanism in oral can-*  
853 *cer* [abstract]. In: *Proceedings of the 107th Annual Meeting of the American Association for*  
854 *Cancer Research*; 2016 Apr 16-20; New Orleans, LA. Philadelphia (PA): AACR; *Cancer*  
855 *Res* 2016;76(14 Suppl):Abstract nr 251.
- 856 47. Kang R, Zhang Q, Zeh HJ 3rd, Lotze MT, Tang D. *HMGB1 in cancer: good, bad, or both?*  
857 *Clin Cancer Res*. 2013 Aug 1; 19(15):4046-57. doi: 10.1158/1078-0432.CCR-13-0495.  
858 Epub 2013 May 30.
- 859 48. Husebye H et al. *Endocytic pathways regulate Toll-like receptor 4 signaling and link innate*  
860 *and adaptive immunity.* *EMBO J*. 2006 Feb 22;25(4):683-92. doi:  
861 10.1038/sj.emboj.7600991. Epub 2006 Feb 9.



- 862 49. Dai X, Zhang J, Arfuso F, et al. *Targeting TNF-related apoptosis-inducing ligand (TRAIL)*  
863 *receptor by natural products as a potential therapeutic approach for cancer therapy. Exp*  
864 *Biol Med (Maywood)*. 2015; 240(6):760-773. doi:10.1177/1535370215579167
- 865 50. Yan J, Ma C, Cheng J, Li Z, Liu C. *HAX-1 inhibits apoptosis in prostate cancer through the*  
866 *suppression of caspase-9 activation. Oncology reports*. 2015;34:2776–81.  
867 doi: 10.3892/or.2015.4202.
- 868 51. Risa Torkin, Jean-François Lavoie, David R. Kaplan and Herman Yeger. *Induction of*  
869 *caspase-dependent, p53-mediated apoptosis by apigenin in human neuroblastoma. Mol*  
870 *Cancer Ther* January 1 2005 (4) (1) 1-11.
- 871 52. Das B, Tsuchida R, Baruchel S, Malkin DYH. *The Idea and Evidence for the Tumor Stem-*  
872 *ness Switch*. Rajasekhar VK, Vemuri MC, editors. New Jersey, United States: Regul Net-  
873 works Stem Cells Stem Cell Biol Regen Med Humana Press; (2009). 10.1007/978-1-60327-  
874 227-8\_35
- 875 53. Das B. *Altruistic stem cell and cancer stem cells*. In: Rajasekhar VK, editor. *Cancer stem*  
876 *cells*. Hoboken, NJ: Wiley Press; (2014). p. 89–105. 10.1002/9781118356203.ch7.
- 877 54. Pal B, Bhuyan S, Garhyan J, Yeger H and Das B. *Human embryonic stem cells exhibit al-*  
878 *truistic cell death that release death signals having potent anti-cancer activity. Cancer*  
879 *Res* July 1 2017 (77) (13 Supplement) 923; **DOI:** 10.1158/1538-7445.AM2017-923.
- 880 55. Ibrahim S Akeel. *Oral Microbiome Induced Tumor Stemness Pathway in Oral Cancer*. PhD  
881 thesis. Harvard School of Dental Medicine Boston, Massachusetts.  
882 <https://dash.harvard.edu/handle/1/37365590>
- 883 56. Yu DS, Wu CL, Ping SY, Keng C, Shen KH. *Bacille Calmette-Guerin can induce cellular*  
884 *apoptosis of urothelial cancer directly through toll-like receptor 7 activation. Kaohsiung J*  
885 *Med Sci*. 2015 Aug;31(8):391-7.

886 57. Rayamajhi M, Zhang Y, Miao EA. *Detection of pyroptosis by measuring released lactate*  
887 *dehydrogenase activity*. *Methods Mol Biol.* 2013;1040:85-90. doi: 10.1007/978-1-62703-  
888 523-1\_7.

889

890 **Supplementary method**

| Protein name                | Antibody                                                                                                             | ELISA kit                      |
|-----------------------------|----------------------------------------------------------------------------------------------------------------------|--------------------------------|
| p53                         | 2527 (Cell Signaling Technology)                                                                                     | DYC1043-2 R&D                  |
| MDM2                        |                                                                                                                      | DYC1244-2, R&D                 |
| Beta-Actin                  | #3700 (Cell Signaling Technology)                                                                                    |                                |
| Vinculin                    | #4650 (Cell Signaling Technology)                                                                                    |                                |
| TLR 4                       | NB100-56566 (Novus Biologicals) for ELISA/WB.<br>Mabg-htlr4 (InvivoGen, San Diego, CA) for neutralizing.             |                                |
| Cleaved Gasdermin D (GSDMD) | #36425 rabbit polyclonal (Cell Signaling Technology) and<br>#H00079792-M01 (Abnova).                                 |                                |
| TLR2                        | NB100-56722 (Novus Biologicals) for ELISA/WB.<br>Maba2-htlr2 (InvivoGen, San Diego, CA) for neutralizing.            |                                |
| HMGB1                       | H00003146-M08 (Novus Biologicals, Littleton, CO) Western blot, and<br>neutralization.<br>#ab228624 A (Abcam) for IP. | #NBP2-62766, Novus Biologicals |
| Cleaved caspase 1           | #A1004 rabbit polyclonal (Biovision, Milpitas, CA).<br>#sc-56036 mouse monoclonal (SantaCruz)                        |                                |
| ABCG2                       | AB3380 (Abcam)                                                                                                       | MBS703358<br>Mybiosource, CA   |
| Cleaved caspase 3           | PAS-114687 rabbit polyclonal (Thermofisher scientific).                                                              | DYC835-2                       |

891

892 **Table 1:** The information about various ELISA kit and antibody details
